# Supplementary material for: Novel 2-alkythio-4-chloro-N-[imino(heteroaryl)methyl]benzenesulfonamide Derivatives: Synthesis, Molecular Structure, Anticancer Activity and Metabolic Stability
Source: MDPI journal article supplement (doi:10.3390/ijms24119768), 2023-06-05
Supplement: s1 [file s1]

## Supplementary material

### Novel 2-alkythio-4-chloro-*N*-[imino(heteroaryl)methyl]benzenesulfonamide derivatives: synthesis, molecular structure, anticancer activity and metabolic stability

Beata Żolnowska <sup>1,\*</sup>, Jarosław Sławiński <sup>1</sup>, Mariusz Belka <sup>2</sup>, Tomasz Bączek <sup>2</sup>, Jarosław Chojnacki <sup>3</sup> and Anna Kawiak <sup>4,\*</sup>

<sup>1</sup> Department of Organic Chemistry, Medical University of Gdańsk, Al. Gen. J. Hallera 107, 80-416 Gdańsk, Poland; beata.zolnowska@gumed.edu.pl, jaroslaw.slawinski@gumed.edu.pl

<sup>2</sup> Department of Pharmaceutical Chemistry, Medical University of Gdańsk, Al. Gen. J. Hallera 107, 80-416 Gdańsk, Poland; mariusz.belka@gumed.edu.pl, tbaczek@gumed.edu.pl

<sup>3</sup> Department of Inorganic Chemistry, Gdańsk University of Technology, ul. Narutowicza 11/12, 80-233 Gdańsk, Poland; jaroslaw.chojnacki@pg.edu.pl

<sup>4</sup> Department of Biotechnology, Intercollegiate Faculty of Biotechnology, University of Gdańsk and Medical University of Gdańsk, ul. Abrahamowa 58, 80-307 Gdańsk, Poland; anna.kawiak@biotech.ug.edu.pl

\* Correspondence: beata.zolnowska@gumed.edu.pl (BZ); anna.kawiak@biotech.ug.edu.pl (AK)

#### Contents:

**Table S1.** Crystal data and structure refinement details for **10**.

**Table S2.** Hydrogen-bond geometry (Å, °) for **10**.

<sup>1</sup>H NMR of compd **9** (500 MHz, DMSO-*d*<sub>6</sub>).

<sup>13</sup>C NMR of compd **9** (125 MHz, DMSO-*d*<sub>6</sub>).

<sup>1</sup>H NMR of compd **11** (500 MHz, DMSO-*d*<sub>6</sub>).

<sup>13</sup>C NMR of compd **11** (150.9 MHz, DMSO-*d*<sub>6</sub>).

<sup>1</sup>H NMR of compd **12** (500 MHz, DMSO-*d*<sub>6</sub>).

<sup>13</sup>C NMR of compd **12** (150.9 MHz, DMSO-*d*<sub>6</sub>).

<sup>1</sup>H NMR of compd **13** (500 MHz, DMSO-*d*<sub>6</sub>).

<sup>13</sup>C NMR of compd **13** (125 MHz, DMSO-*d*<sub>6</sub>).

<sup>1</sup>H NMR of compd **14** (500 MHz, DMSO-*d*<sub>6</sub>).

<sup>13</sup>C NMR of compd **14** (150.9 MHz, DMSO-*d*<sub>6</sub>).

<sup>1</sup>H NMR of compd **15** (200 MHz, DMSO-*d*<sub>6</sub>).

<sup>13</sup>C NMR of compd **15** (125 MHz, DMSO-*d*<sub>6</sub>).

<sup>1</sup>H NMR of compd **21** (500 MHz, DMSO-*d*<sub>6</sub>).

<sup>13</sup>C NMR of compd **21** (125 MHz, DMSO-*d*<sub>6</sub>).

<sup>1</sup>H NMR of compd **22** (500 MHz, DMSO-*d*<sub>6</sub>).

<sup>13</sup>C NMR of compd **22** (125 MHz, DMSO-*d*<sub>6</sub>).

<sup>1</sup>H NMR of compd **23** (500 MHz, DMSO-*d*<sub>6</sub>).

<sup>13</sup>C NMR of compd **23** (125 MHz, DMSO-*d*<sub>6</sub>).

**Table S1.** Crystal data and structure refinement details for **10**.

|                                                                                    |                                                                                                                                                                                                                                                                                                            |
|------------------------------------------------------------------------------------|------------------------------------------------------------------------------------------------------------------------------------------------------------------------------------------------------------------------------------------------------------------------------------------------------------|
| Crystal data                                                                       |                                                                                                                                                                                                                                                                                                            |
| Chemical formula                                                                   | C <sub>20</sub> H <sub>18</sub> ClF <sub>3</sub> N <sub>4</sub> O <sub>2</sub> S <sub>3</sub>                                                                                                                                                                                                              |
| <i>M</i> <sub>r</sub>                                                              | 535.01                                                                                                                                                                                                                                                                                                     |
| Crystal system, space group                                                        | Monoclinic, <i>P</i> 2 <sub>1</sub> / <i>c</i>                                                                                                                                                                                                                                                             |
| Temperature (K)                                                                    | 120                                                                                                                                                                                                                                                                                                        |
| <i>a</i> , <i>b</i> , <i>c</i> (Å)                                                 | 10.215 (2), 24.427 (3), 10.310 (2)                                                                                                                                                                                                                                                                         |
| β (°)                                                                              | 116.449 (15)                                                                                                                                                                                                                                                                                               |
| <i>V</i> (Å <sup>3</sup> )                                                         | 2303.3 (8)                                                                                                                                                                                                                                                                                                 |
| <i>Z</i>                                                                           | 4                                                                                                                                                                                                                                                                                                          |
| Radiation type                                                                     | Cu <i>K</i> α                                                                                                                                                                                                                                                                                              |
| μ (mm <sup>-1</sup> )                                                              | 4.47                                                                                                                                                                                                                                                                                                       |
| Crystal size (mm)                                                                  | 0.34 × 0.13 × 0.11                                                                                                                                                                                                                                                                                         |
| Data collection                                                                    |                                                                                                                                                                                                                                                                                                            |
| Diffractometer                                                                     | STOE <i>IPDS</i> 2T                                                                                                                                                                                                                                                                                        |
| Absorption correction                                                              | Integration<br>STOE <i>X-RED32</i> , absorption correction by Gaussian integration, analogous to P. Coppens, "The Evaluation of Absorption and Extinction in Single-Crystal Structure Analysis", published in F. R. Ahmed (Editor), "Crystallographic Computing", Munksgaard, Copenhagen (1970), 255 – 270 |
| <i>T</i> <sub>min</sub> , <i>T</i> <sub>max</sub>                                  | 0.223, 0.748                                                                                                                                                                                                                                                                                               |
| No. of measured, independent and observed [ <i>I</i> > 2σ( <i>I</i> )] reflections | 11762, 3416, 3089                                                                                                                                                                                                                                                                                          |
| <i>R</i> <sub>int</sub>                                                            | 0.028                                                                                                                                                                                                                                                                                                      |

|                                                                |                                                                        |
|----------------------------------------------------------------|------------------------------------------------------------------------|
| $\theta_{\max}$ (°)                                            | 60.0                                                                   |
| $(\sin \theta/\lambda)_{\max}$ (Å <sup>-1</sup> )              | 0.562                                                                  |
| Refinement                                                     |                                                                        |
| $R[F^2 > 2\sigma(F^2)]$ , $wR(F^2)$ , $S$                      | 0.034, 0.098, 1.07                                                     |
| No. of reflections                                             | 3416                                                                   |
| No. of parameters                                              | 336                                                                    |
| No. of restraints                                              | 44                                                                     |
| H-atom treatment                                               | H atoms treated by a mixture of independent and constrained refinement |
| $\Delta\rho_{\max}$ , $\Delta\rho_{\min}$ (e Å <sup>-3</sup> ) | 0.30, -0.47                                                            |

**Table S2.** Hydrogen-bond geometry (Å, °) for **10**.

| $D-H\cdots A$      | $D-H$    | $H\cdots A$ | $D\cdots A$ | $D-H\cdots A$ |
|--------------------|----------|-------------|-------------|---------------|
| N2—H2A $\cdots$ O1 | 0.89 (2) | 2.09 (2)    | 2.785 (2)   | 134 (2)       |
| N2—H2B $\cdots$ S3 | 0.86 (2) | 2.28 (2)    | 3.034 (2)   | 147 (2)       |

Computer programs: *X-Area* WinXpose 2.0.22.0 (STOE, 2016), *X-Area* Recipe 1.33.0.0 (STOE, 2015), STOE *X-Area*, ShelXT [40], *SHELXL* [41], Olex2 [42].

40. Sheldrick, G.M. SHELXT – Integrated space-group and crystal-structure determination. *Acta Cryst.* **2015**, A71, 3–8.
41. Sheldrick, G.M. Crystal structure refinement with SHELXL. *Acta Cryst.* **2015**, C71, 3–8.
42. Dolomanov, O.V.; Bourhis, L.J.; Gildea, R.J.; Howard, J.A.K.; Puschmann, H. OLEX2: a complete structure solution, refinement and analysis program. *J. Appl. Cryst.* **2009**, 42, 339–341.

$^1\text{H}$  NMR of compd **9** (500 MHz, DMSO- $d_6$ ).

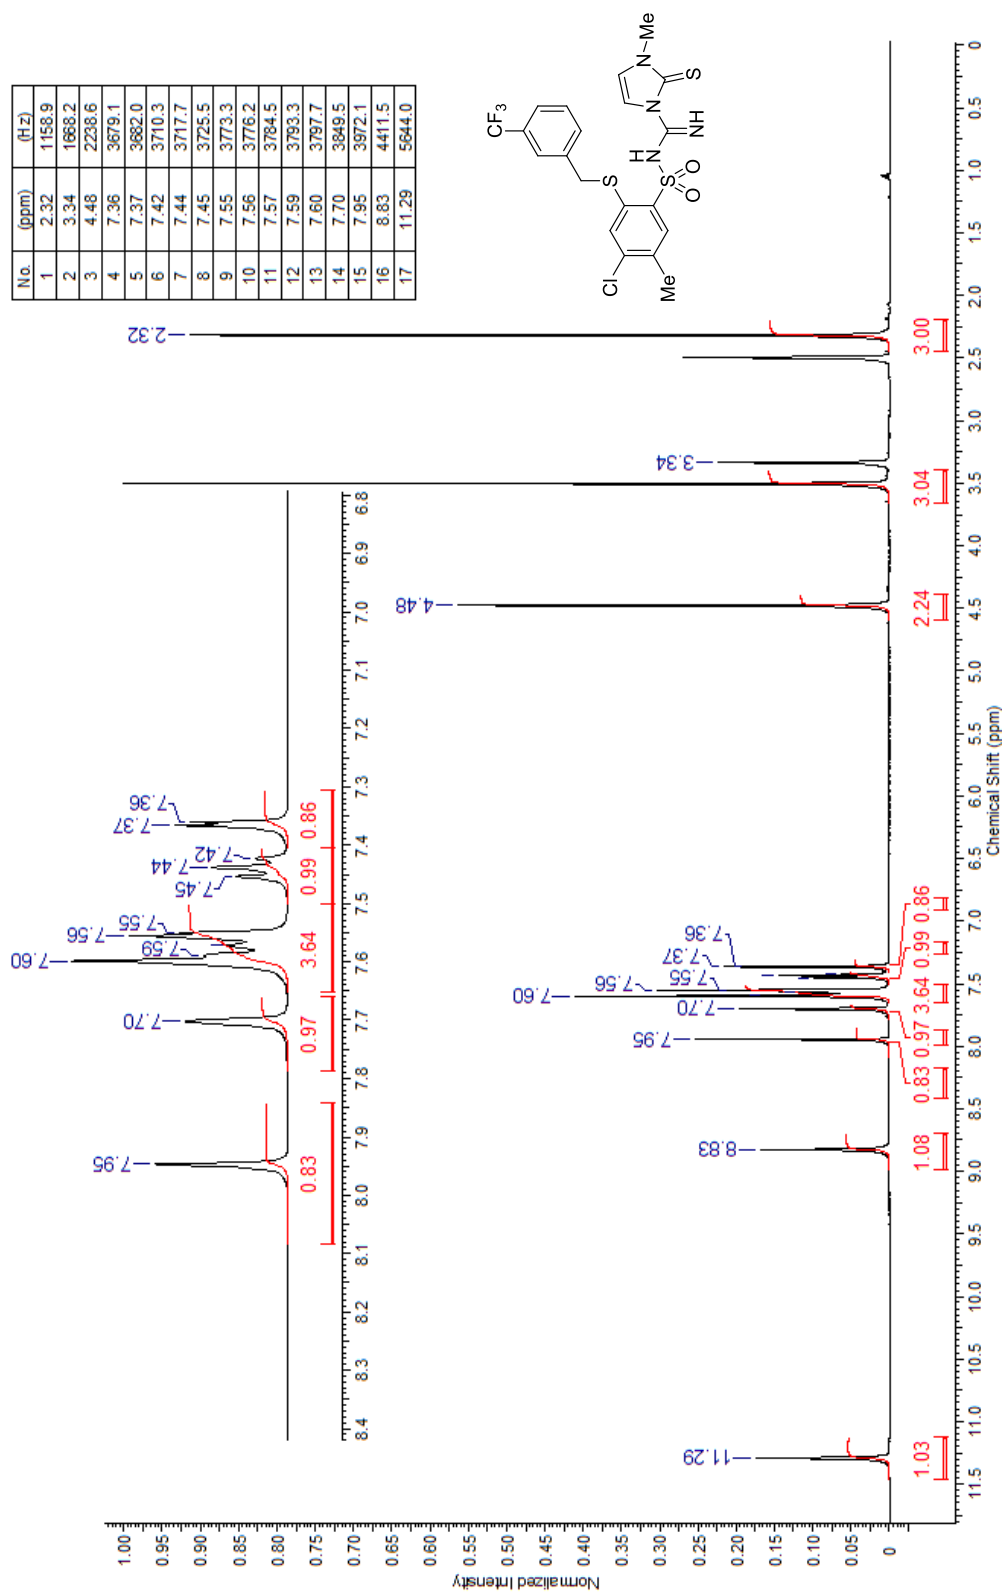

| No. | (ppm) | (Hz)   |
|-----|-------|--------|
| 1   | 2.32  | 1158.9 |
| 2   | 3.34  | 1668.2 |
| 3   | 4.48  | 2238.6 |
| 4   | 7.36  | 3679.1 |
| 5   | 7.37  | 3682.0 |
| 6   | 7.42  | 3710.3 |
| 7   | 7.44  | 3717.7 |
| 8   | 7.45  | 3725.5 |
| 9   | 7.55  | 3773.3 |
| 10  | 7.56  | 3776.2 |
| 11  | 7.57  | 3784.5 |
| 12  | 7.59  | 3793.3 |
| 13  | 7.60  | 3797.7 |
| 14  | 7.70  | 3849.5 |
| 15  | 7.95  | 3972.1 |
| 16  | 8.83  | 4411.5 |
| 17  | 11.29 | 5644.0 |

<sup>13</sup>C NMR of compd **9** (125 MHz, DMSO-*d*<sub>6</sub>).

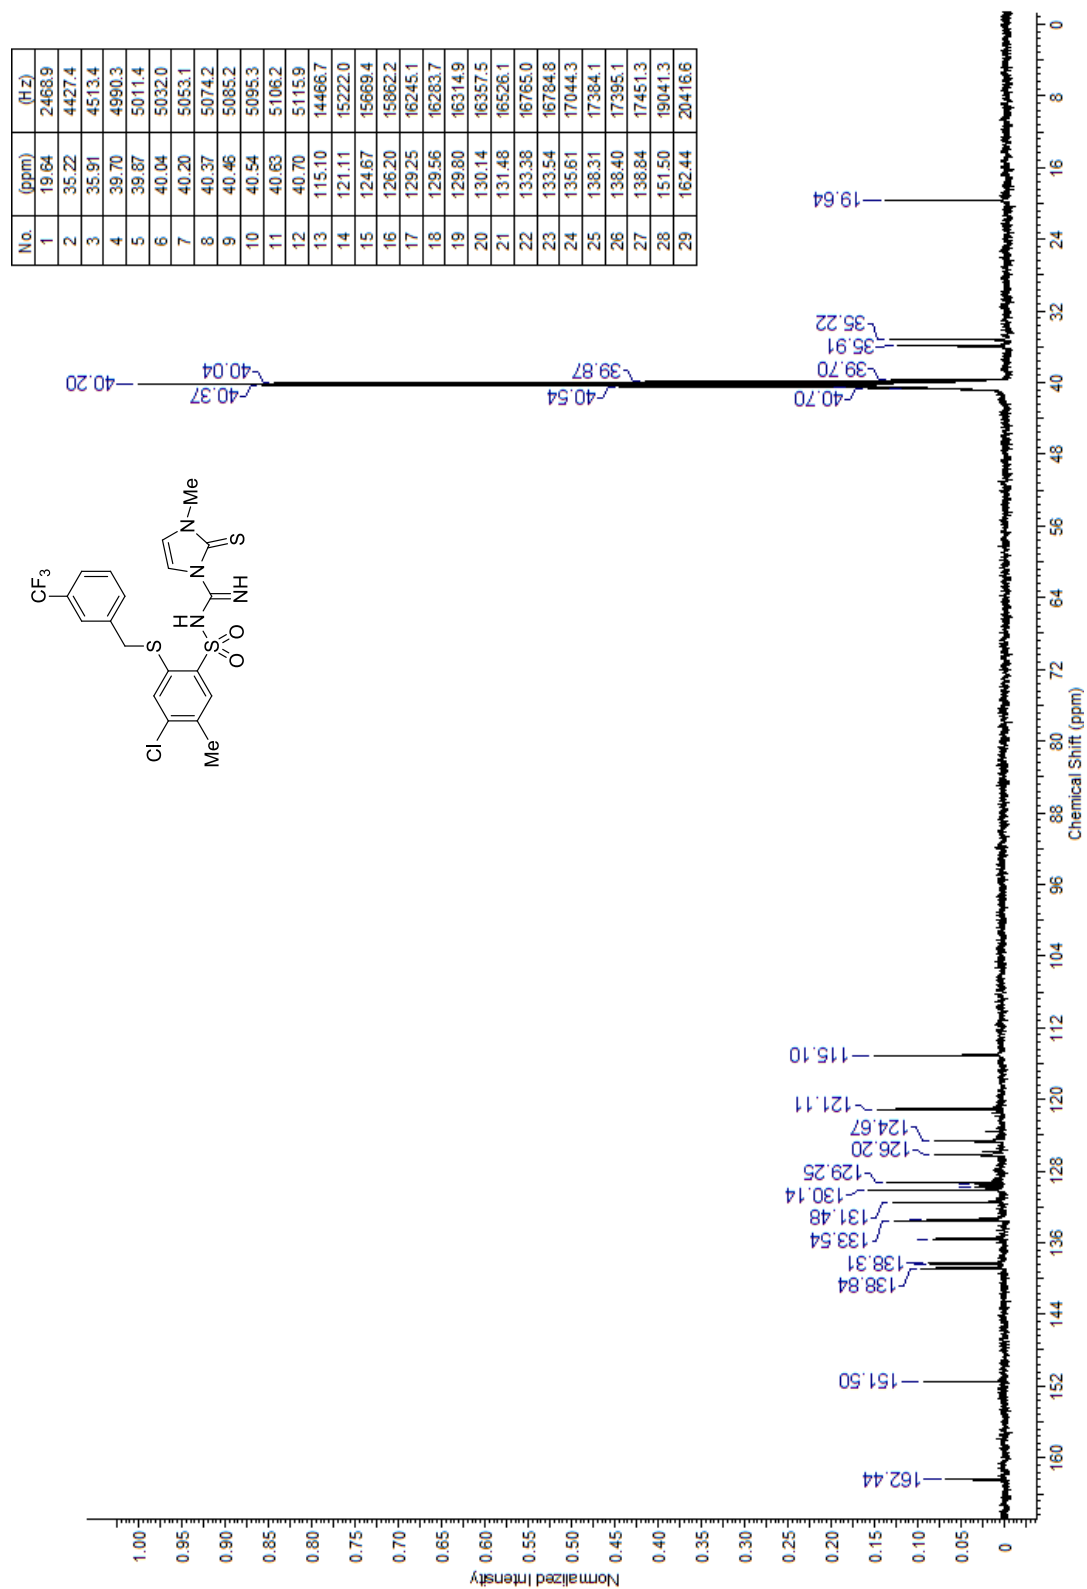

$^1\text{H}$  NMR of compd **11** (500 MHz,  $\text{DMSO}-d_6$ ).

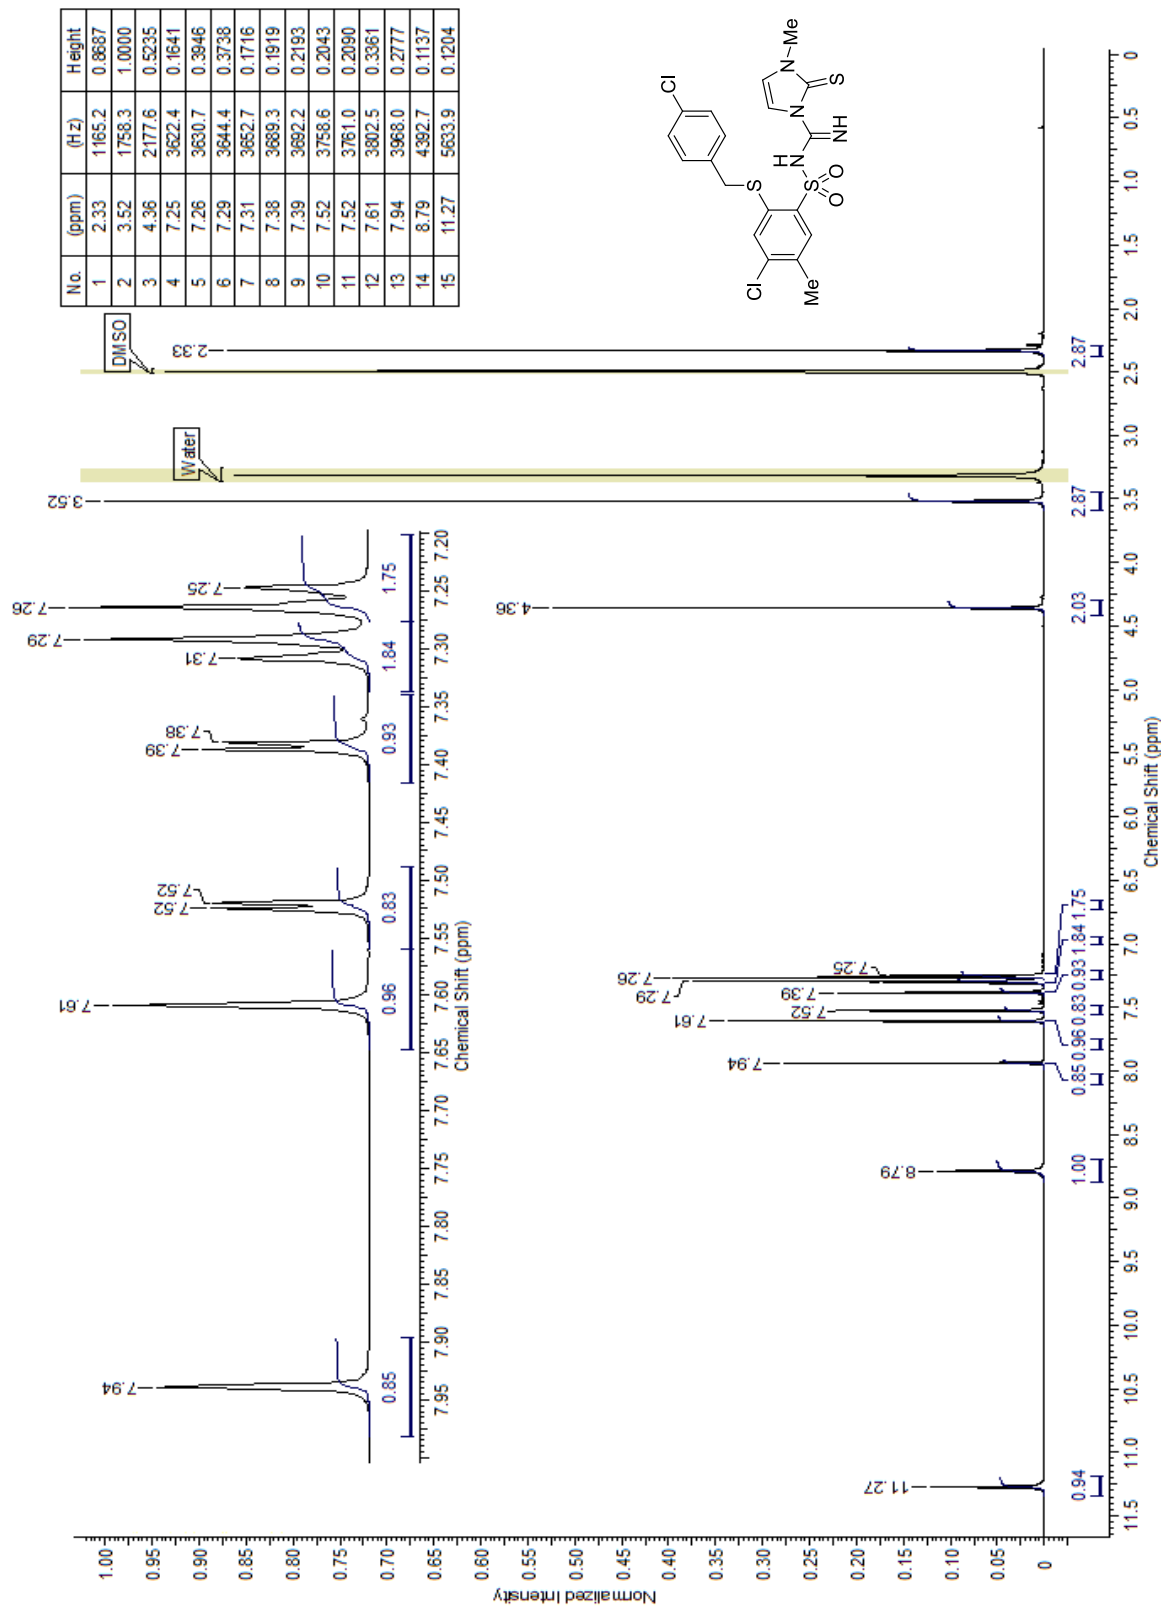

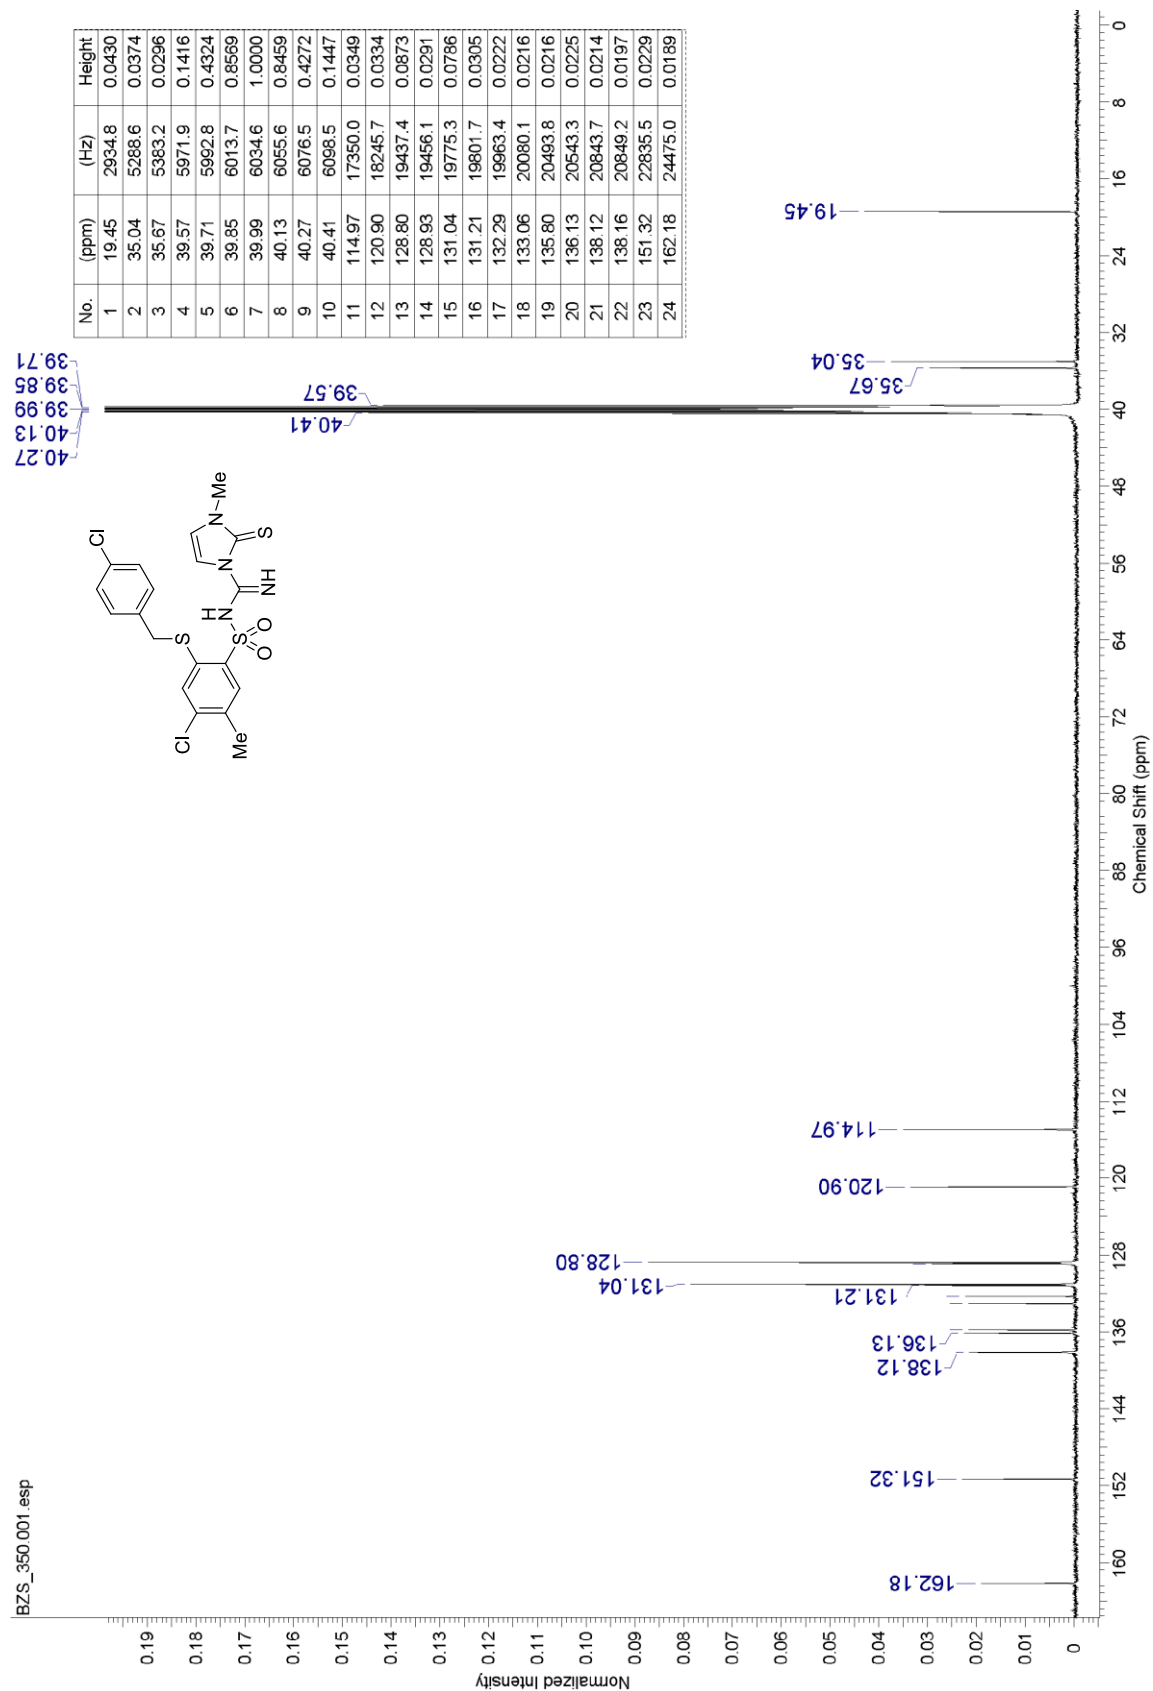

$^{13}\text{C}$  NMR of compd **11** (150.9 MHz,  $\text{DMSO-}d_6$ ).

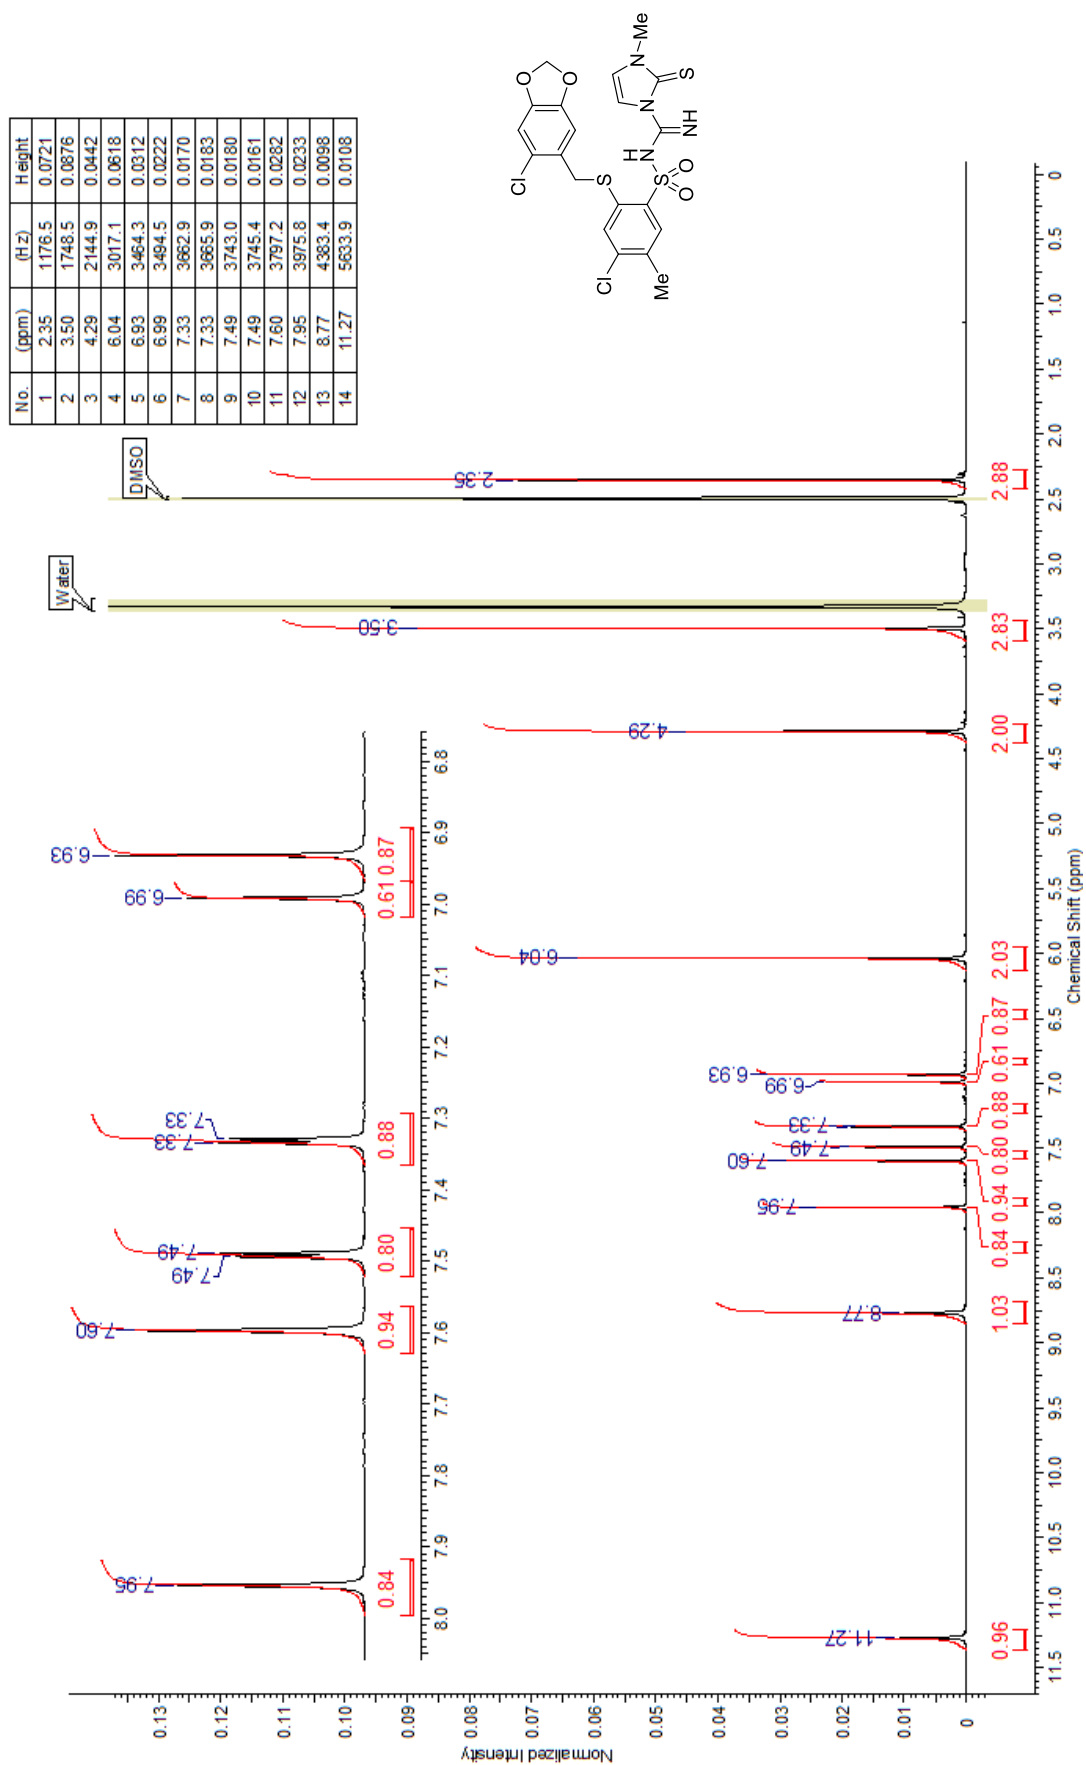

<sup>1</sup>H NMR of compd **12** (500 MHz, DMSO-d<sub>6</sub>).



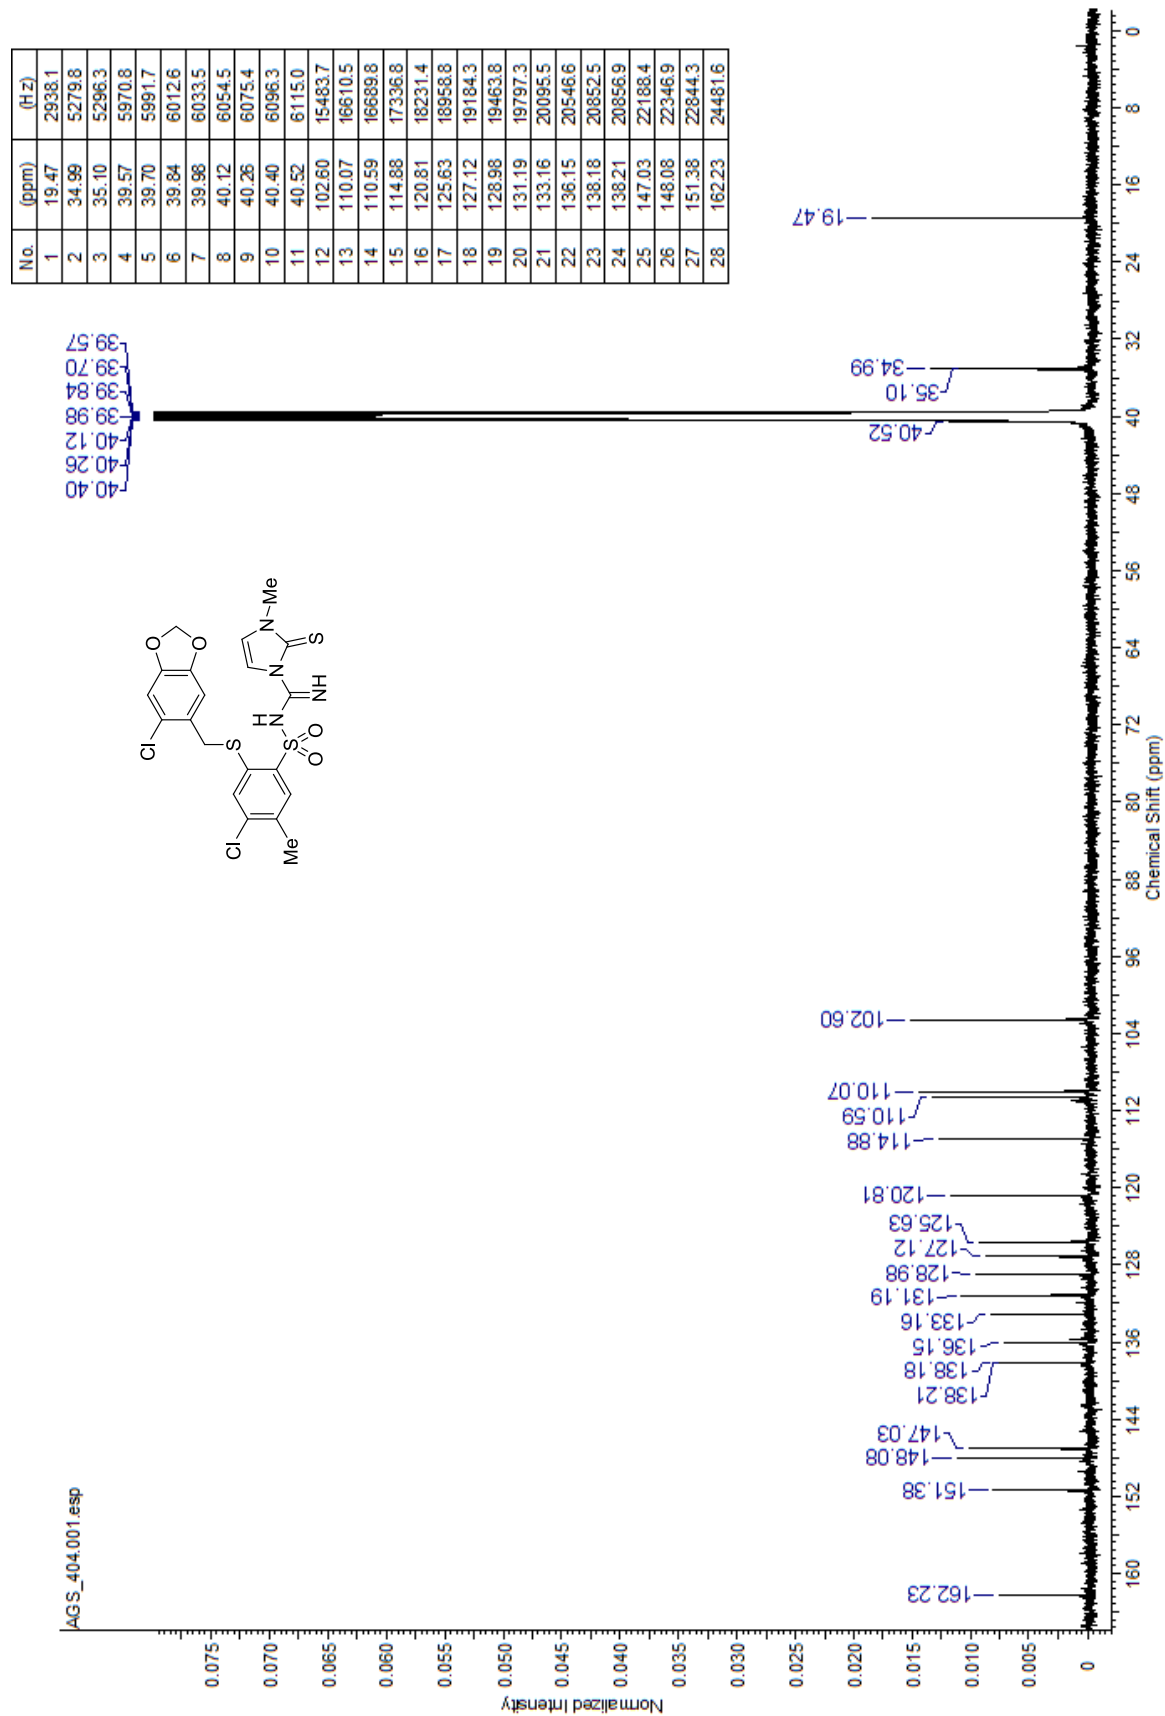

<sup>13</sup>C NMR of compd **12** (150.9 MHz, DMSO-*d*<sub>6</sub>).

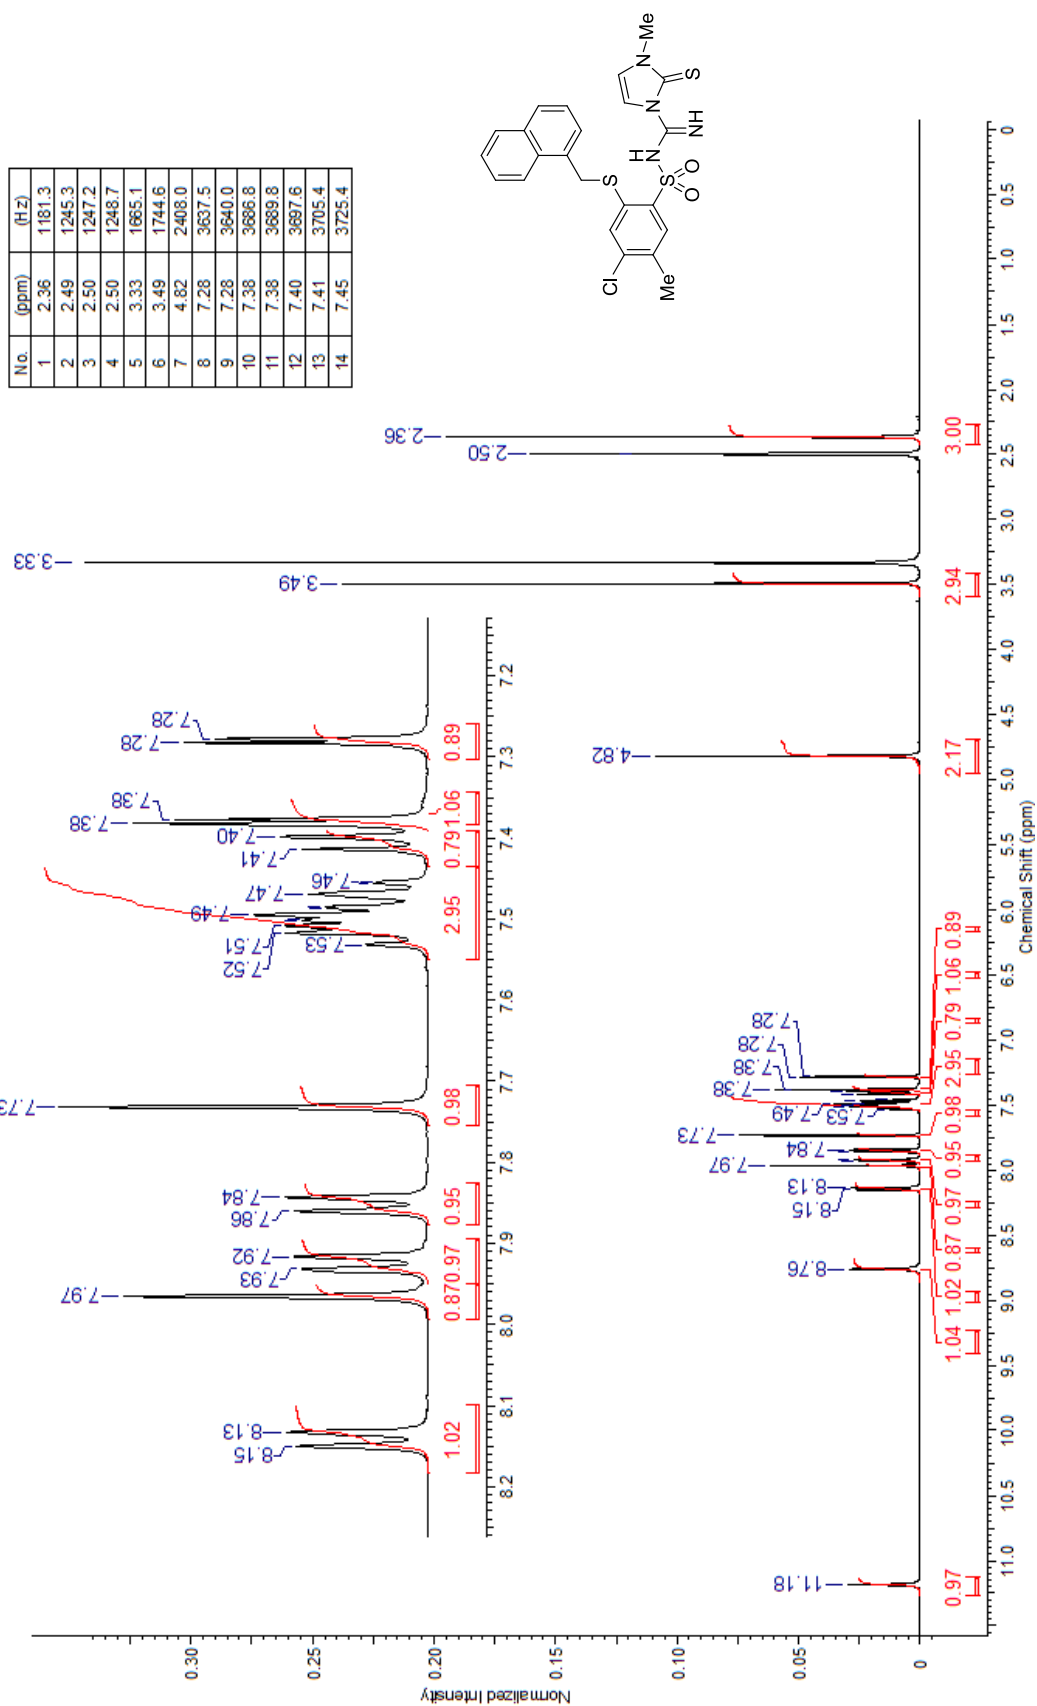

<sup>1</sup>H NMR of compd **13** (500 MHz, DMSO-*d*<sub>6</sub>).

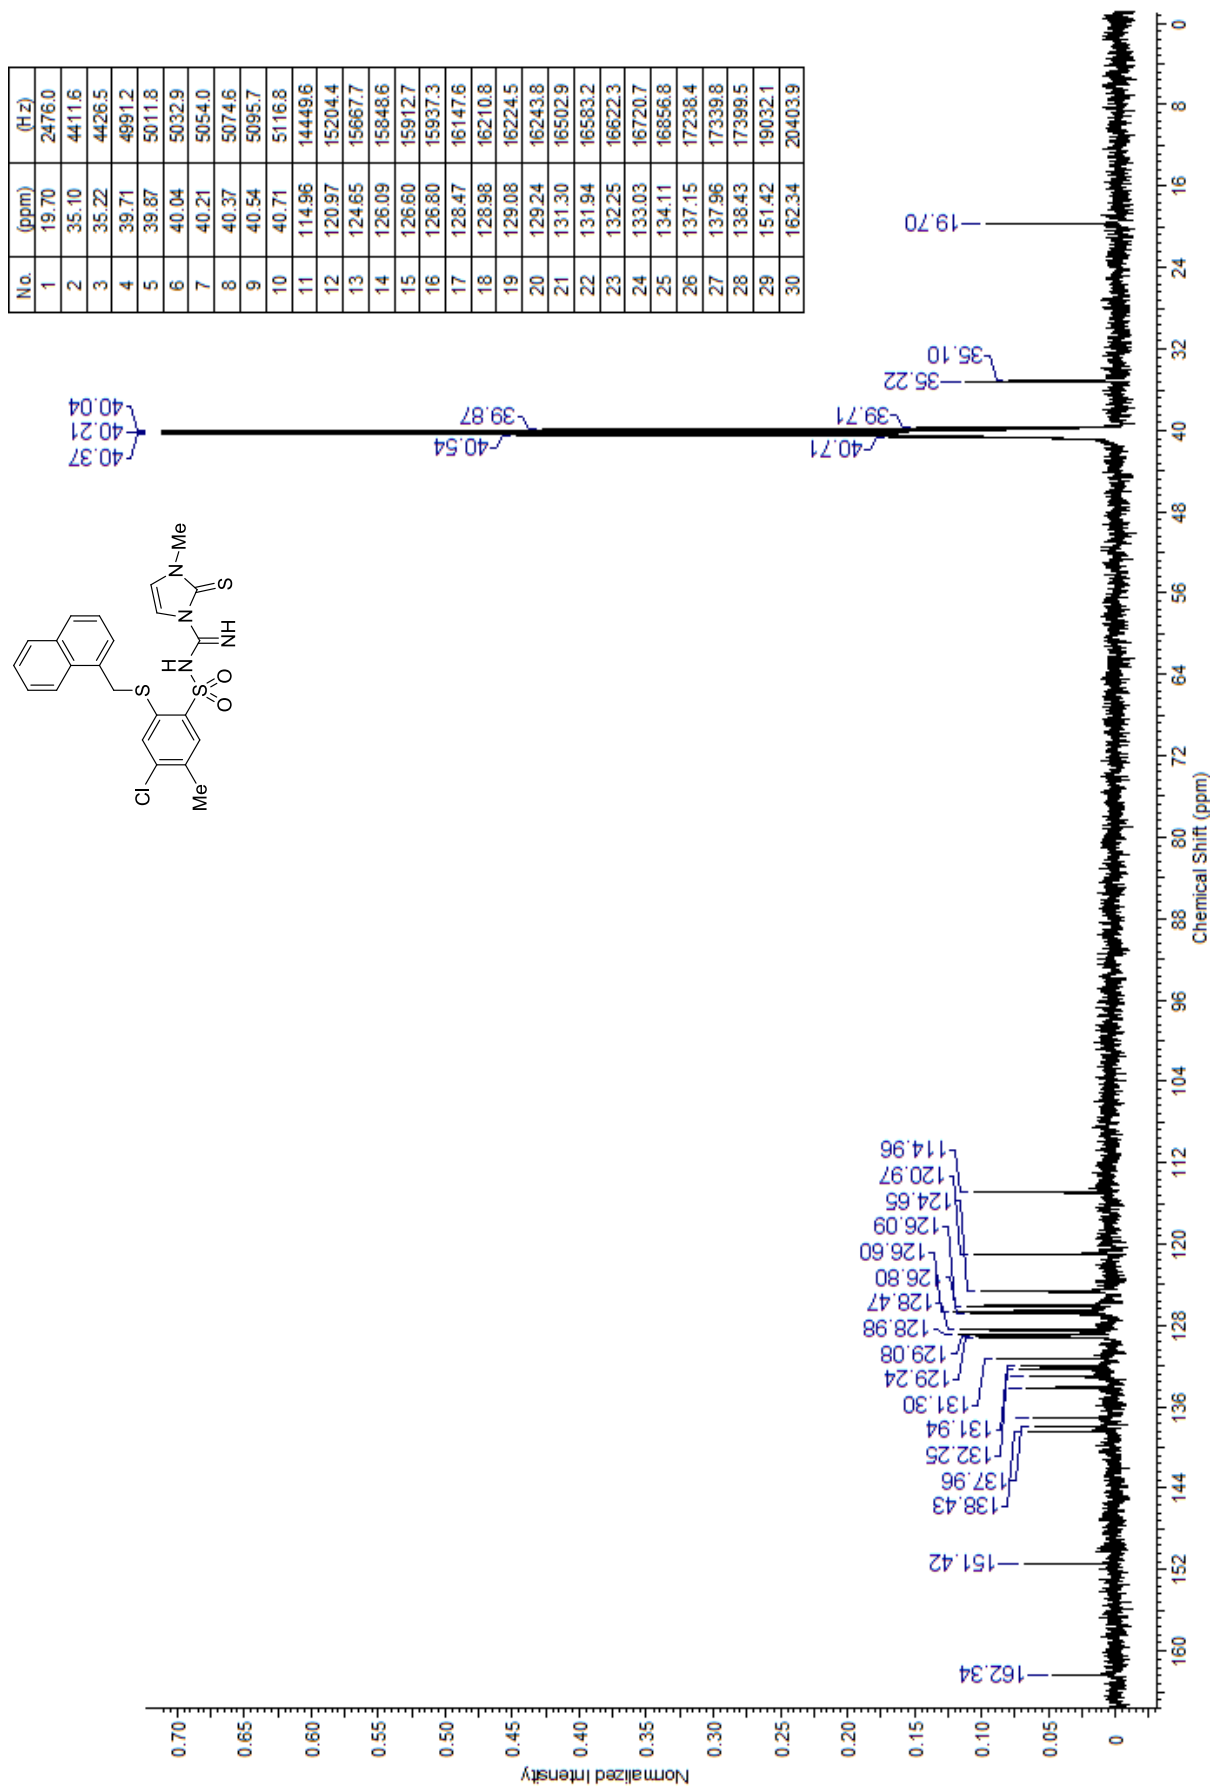

<sup>13</sup>C NMR of compd **13** (125 MHz, DMSO-*d*<sub>6</sub>).

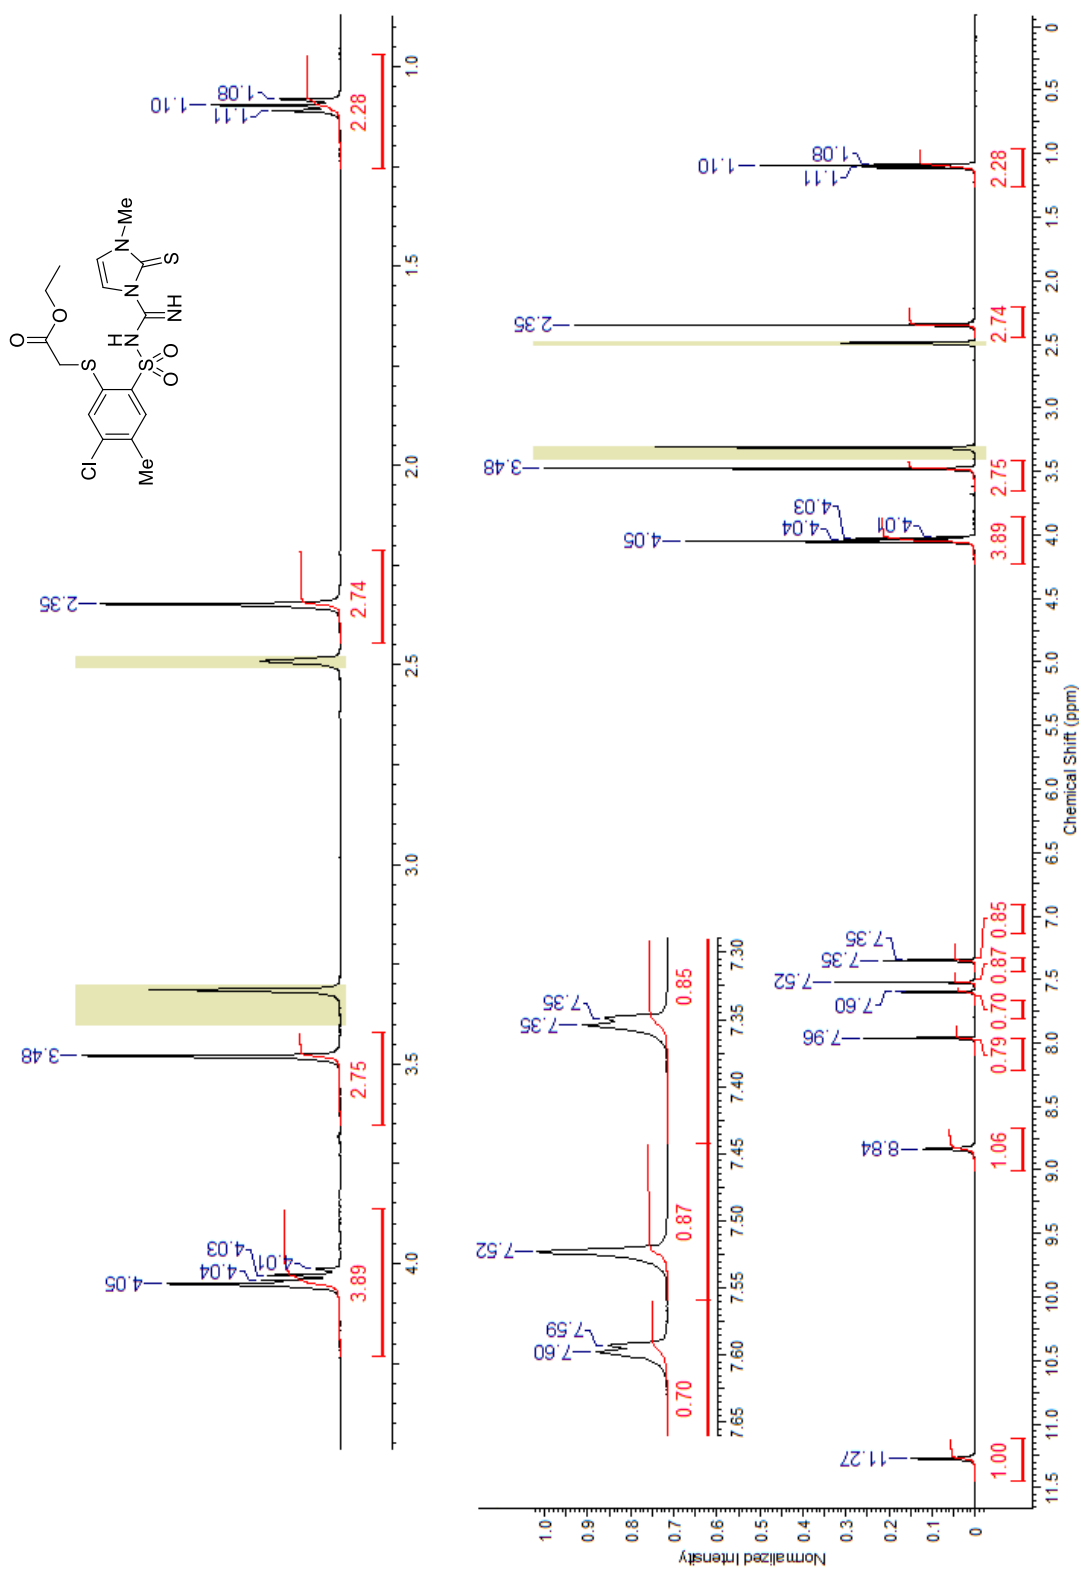

<sup>1</sup>H NMR of compd **14** (500 MHz, DMSO-*d*<sub>6</sub>).

<sup>13</sup>C NMR of compd **14** (150.9 MHz, DMSO-*d*<sub>6</sub>).

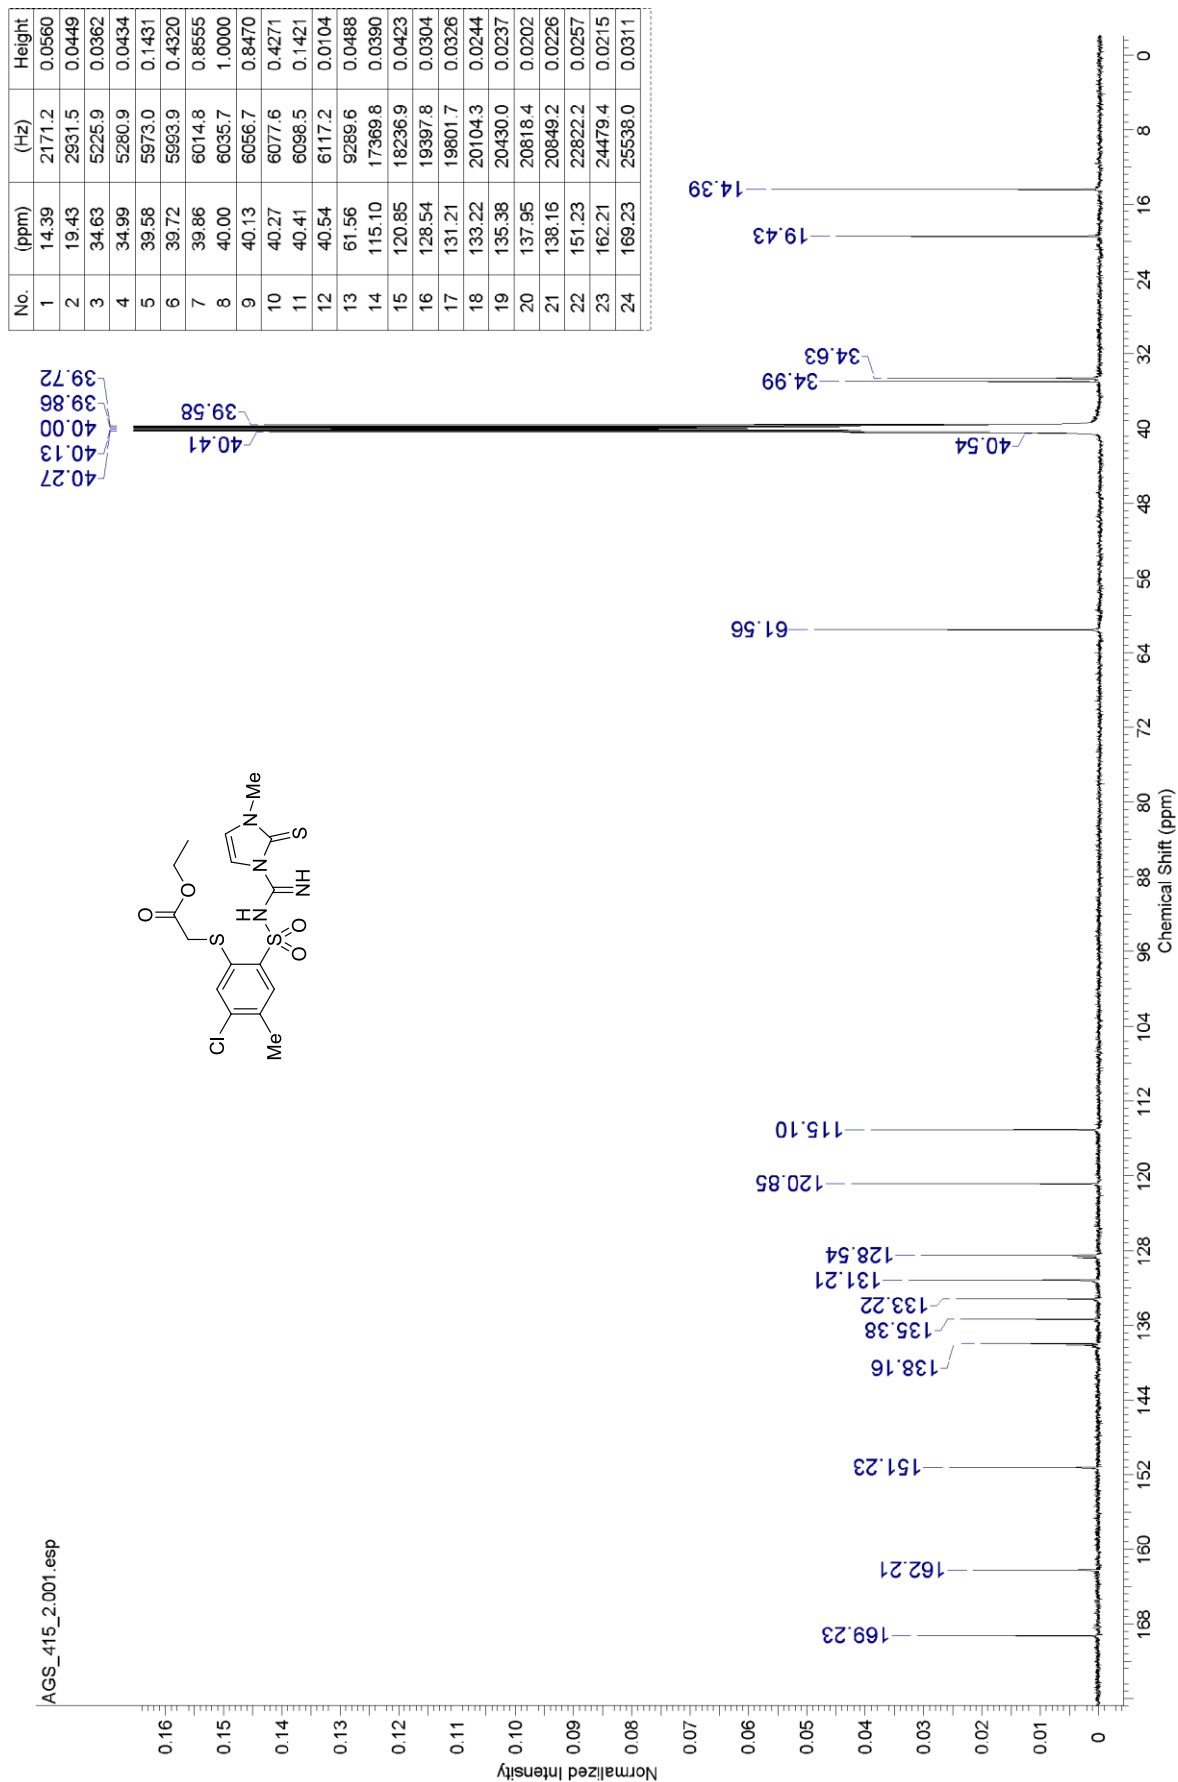

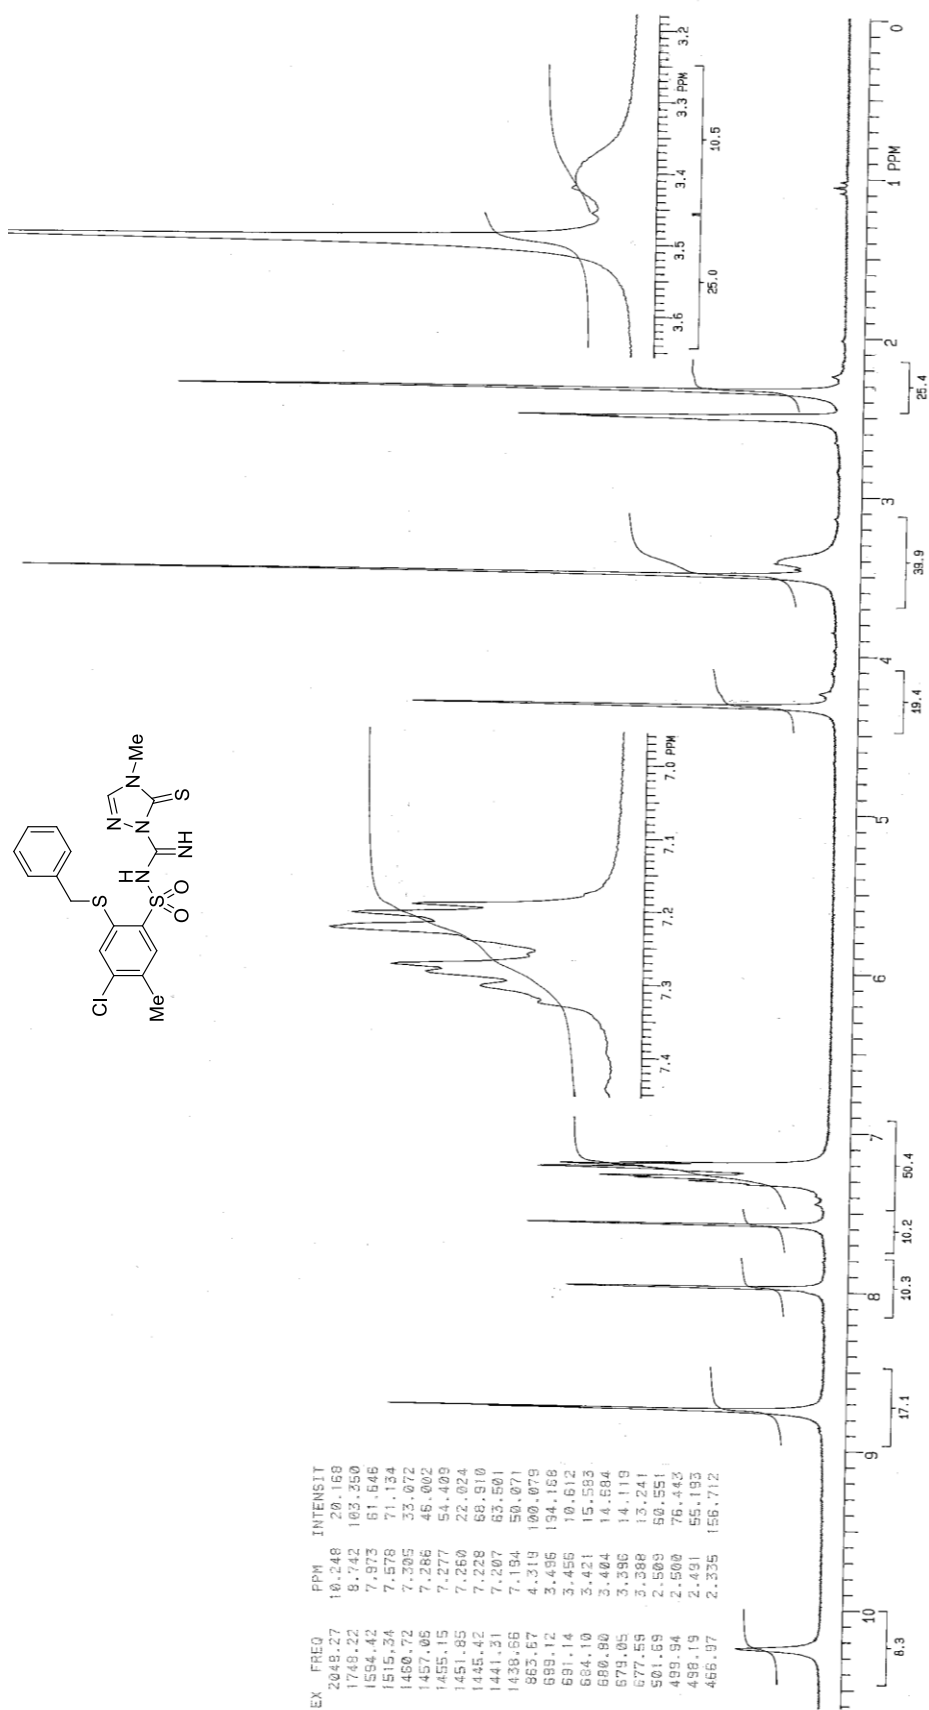

$^1\text{H}$  NMR of compd **15** (50 MHz, DMSO- $d_6$ ).

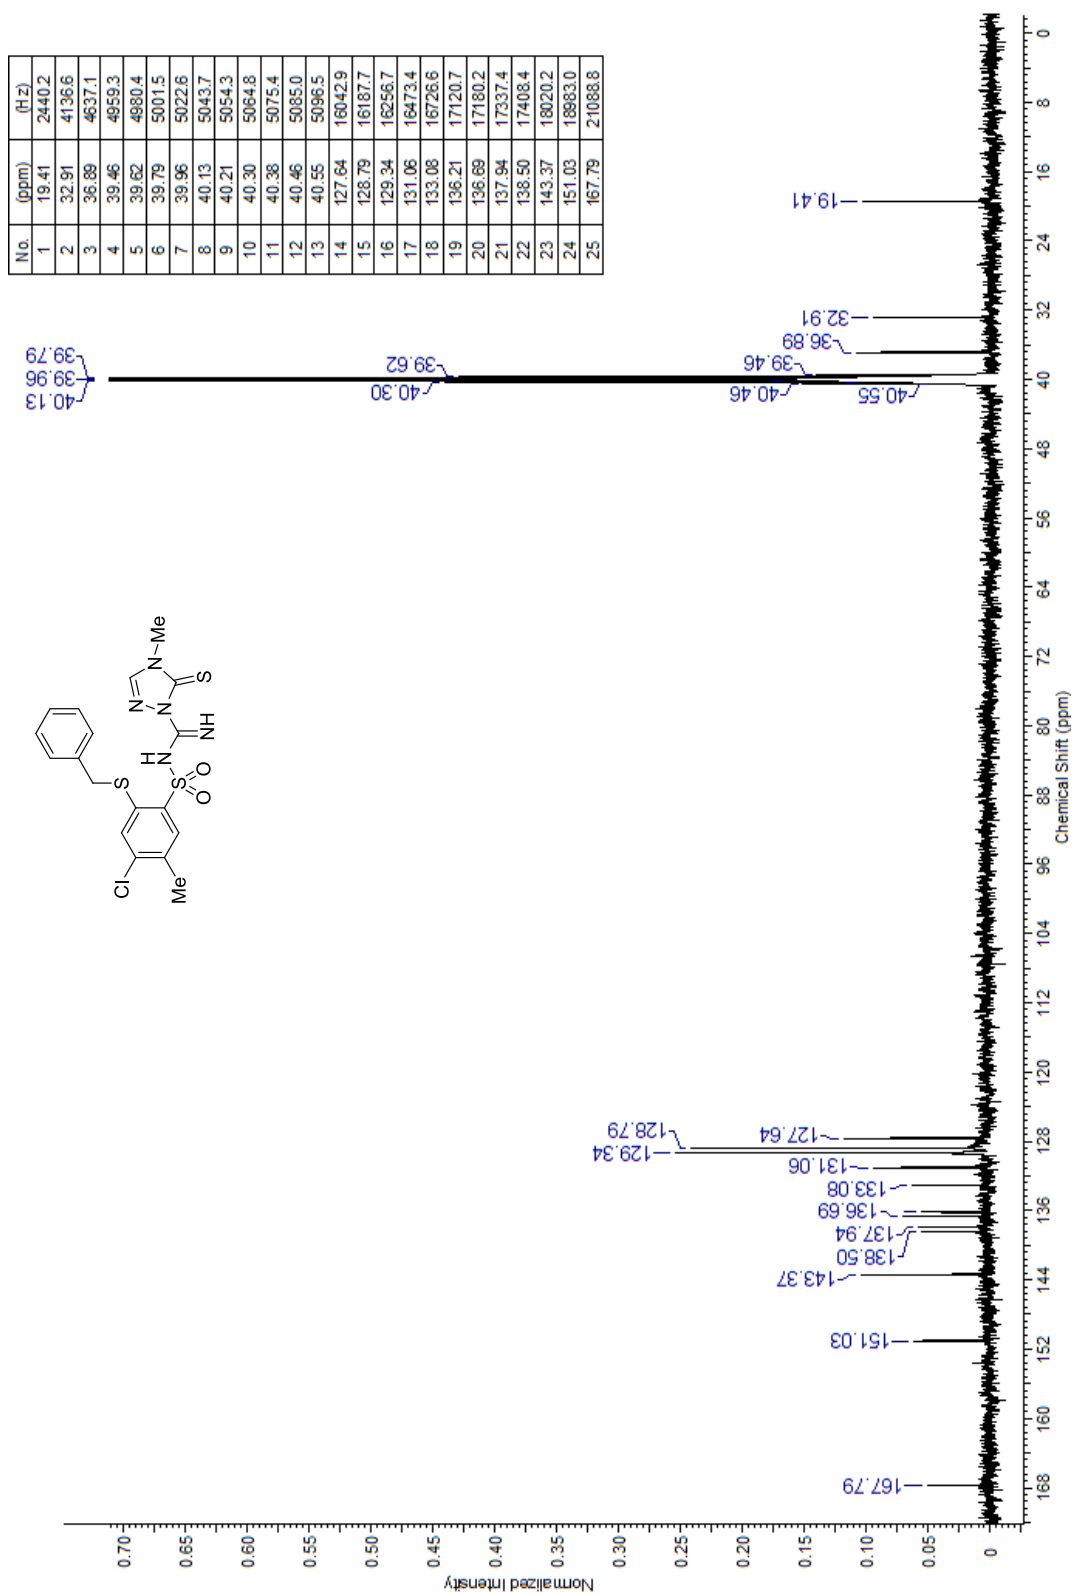

<sup>13</sup>C NMR of compd **15** (125 MHz, DMSO-*d*<sub>6</sub>).

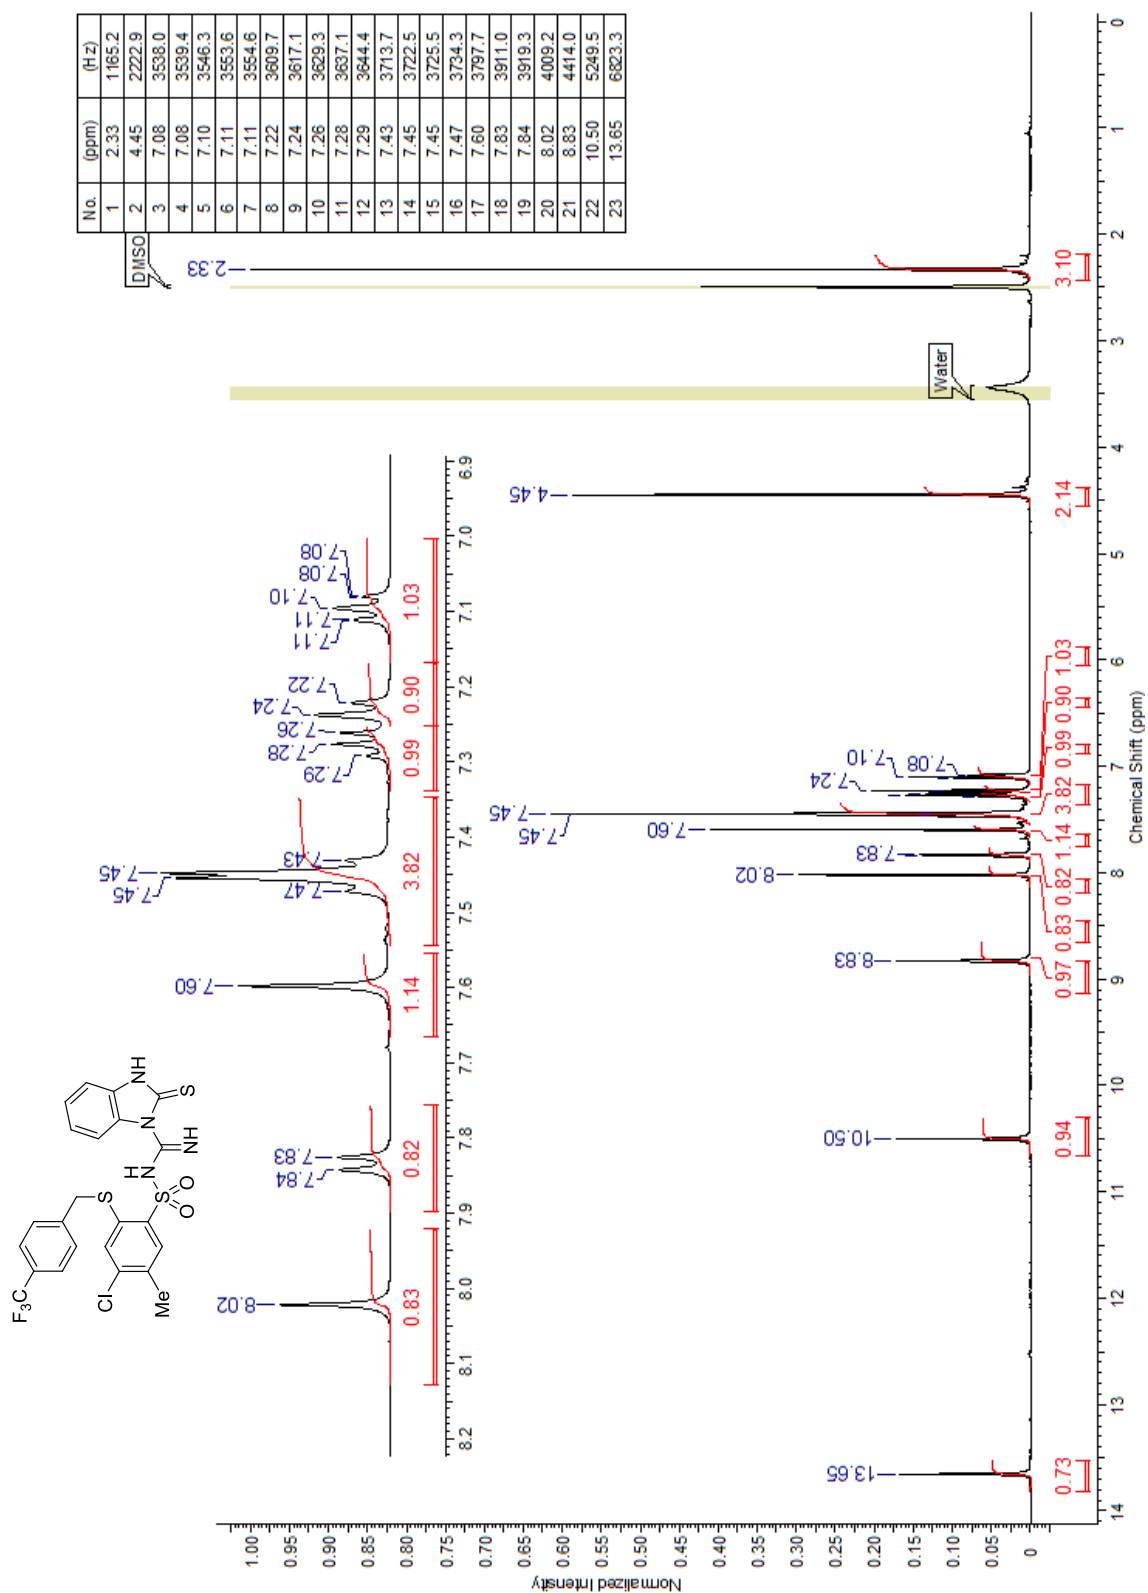

<sup>1</sup>H NMR of compd **21** (500 MHz, DMSO-*d*<sub>6</sub>).



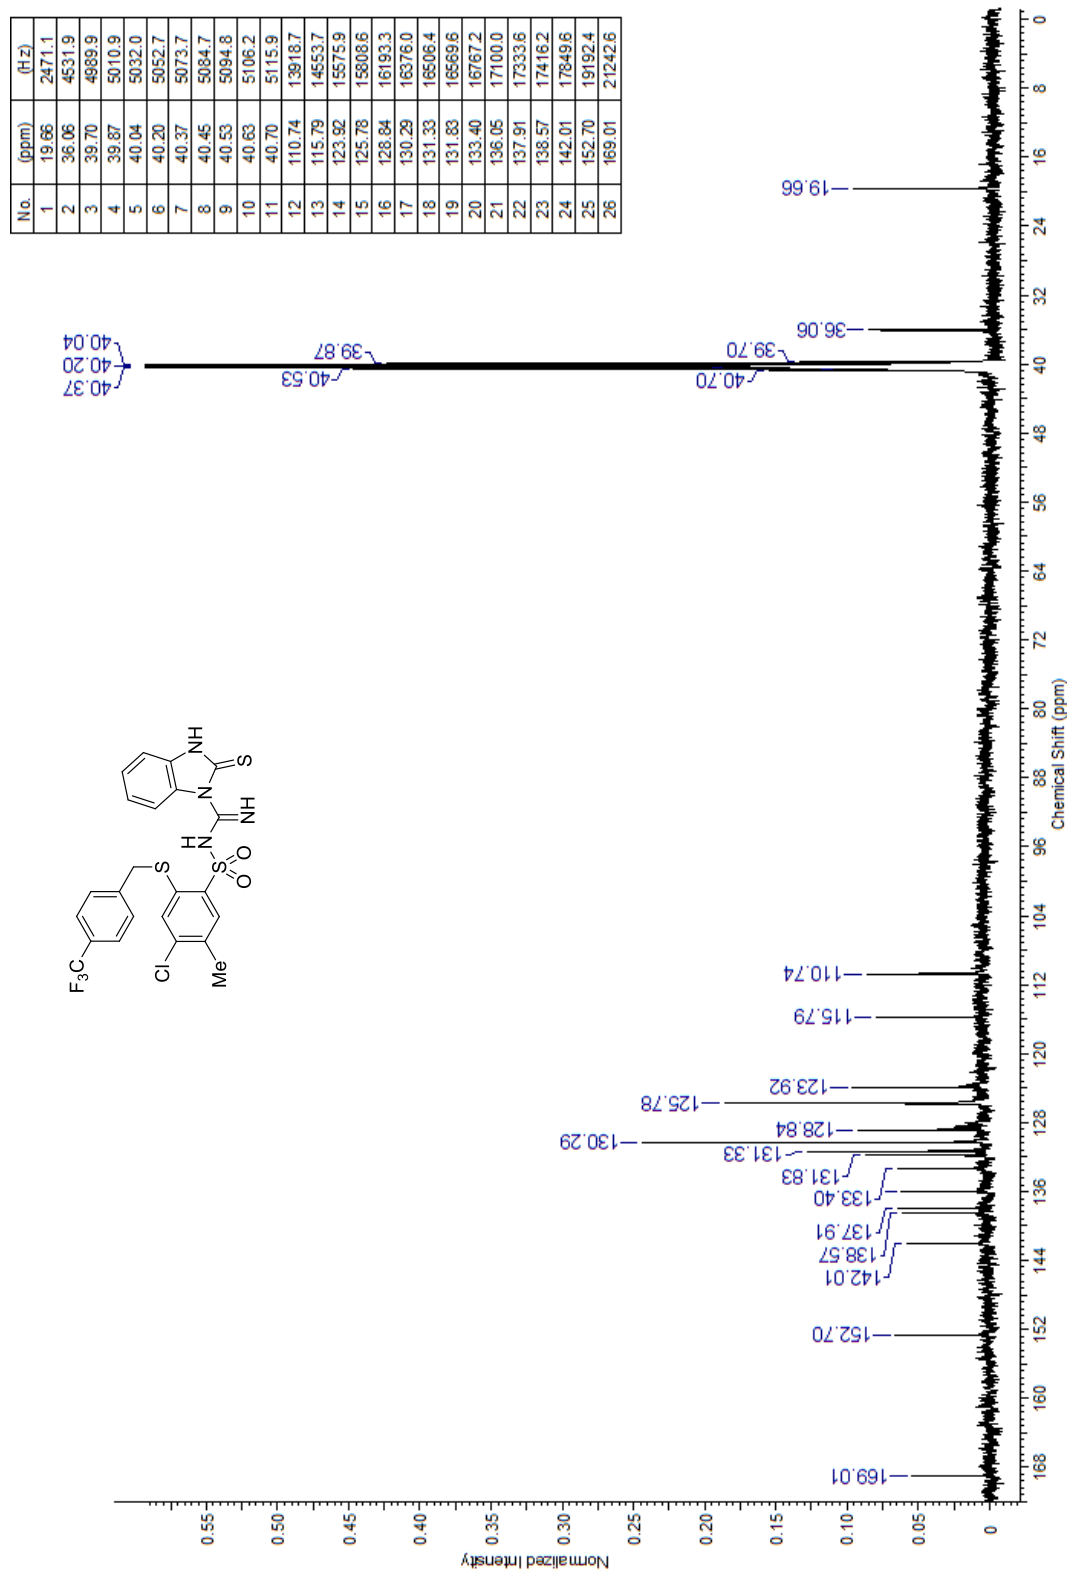

<sup>13</sup>C NMR of compd **21** (125 MHz, DMSO-*d*<sub>6</sub>).

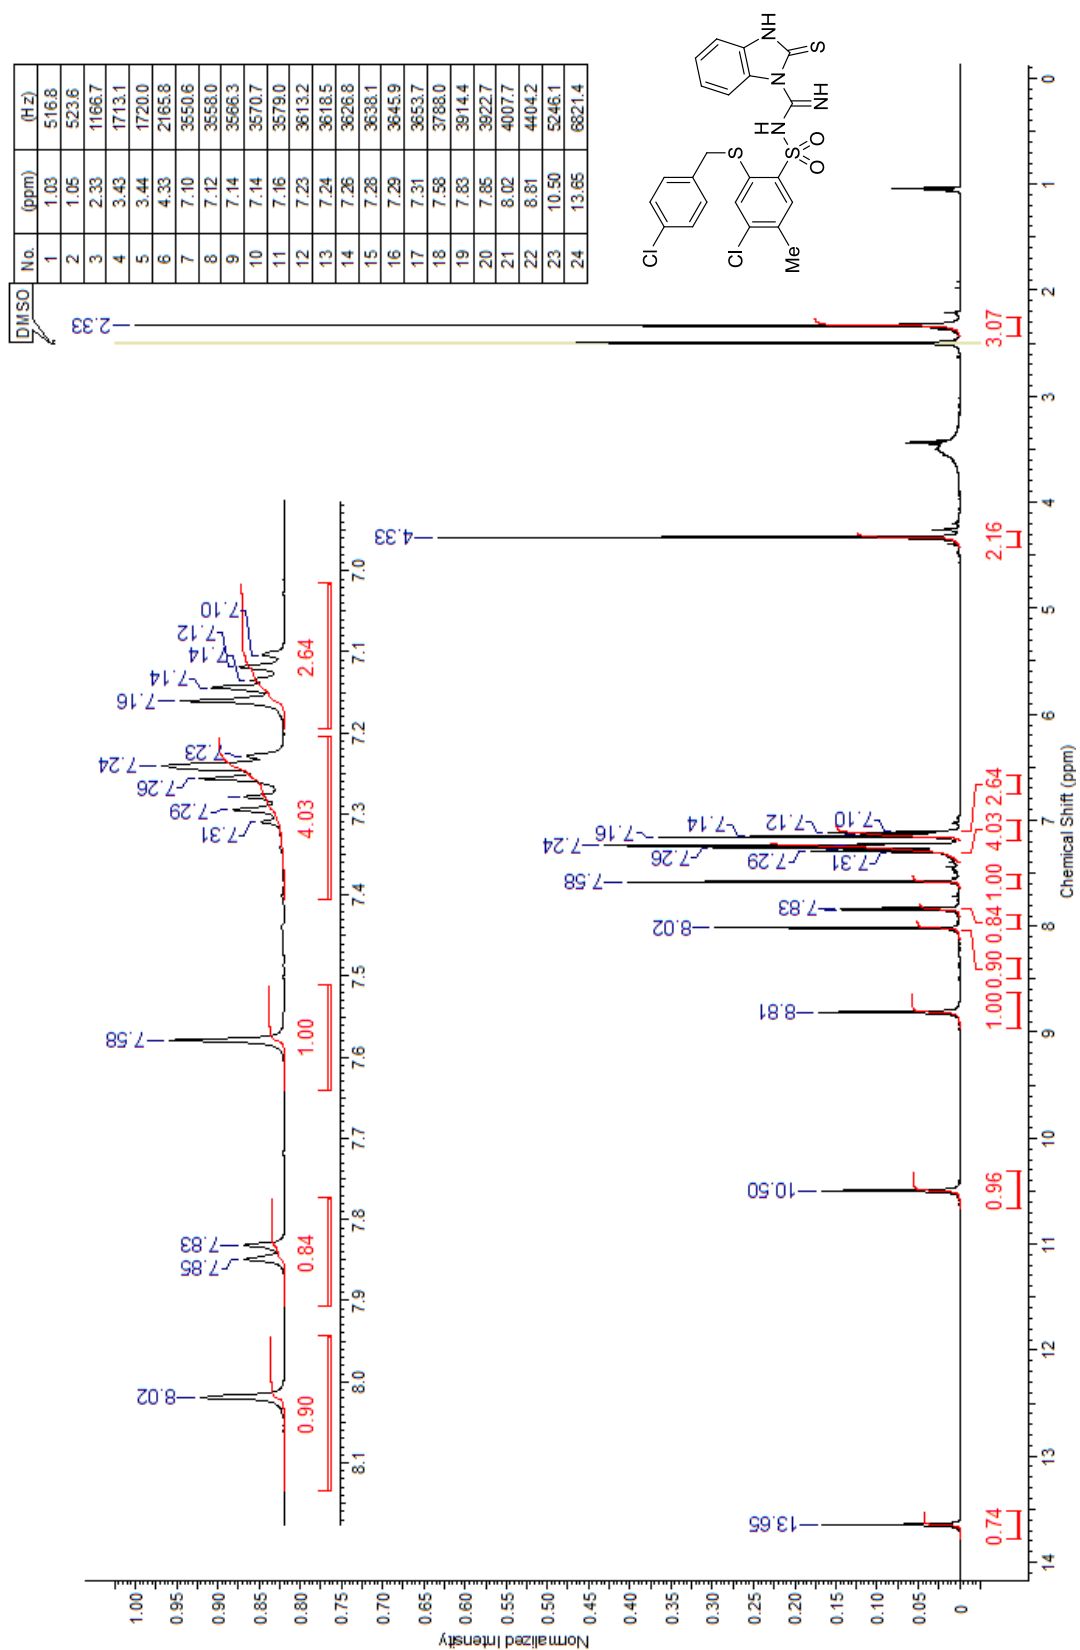

<sup>1</sup>H NMR of compd **22** (500 MHz, DMSO-*d*<sub>6</sub>).

$^{13}\text{C}$  NMR of compd **22** (125 MHz,  $\text{DMSO}-d_6$ ).

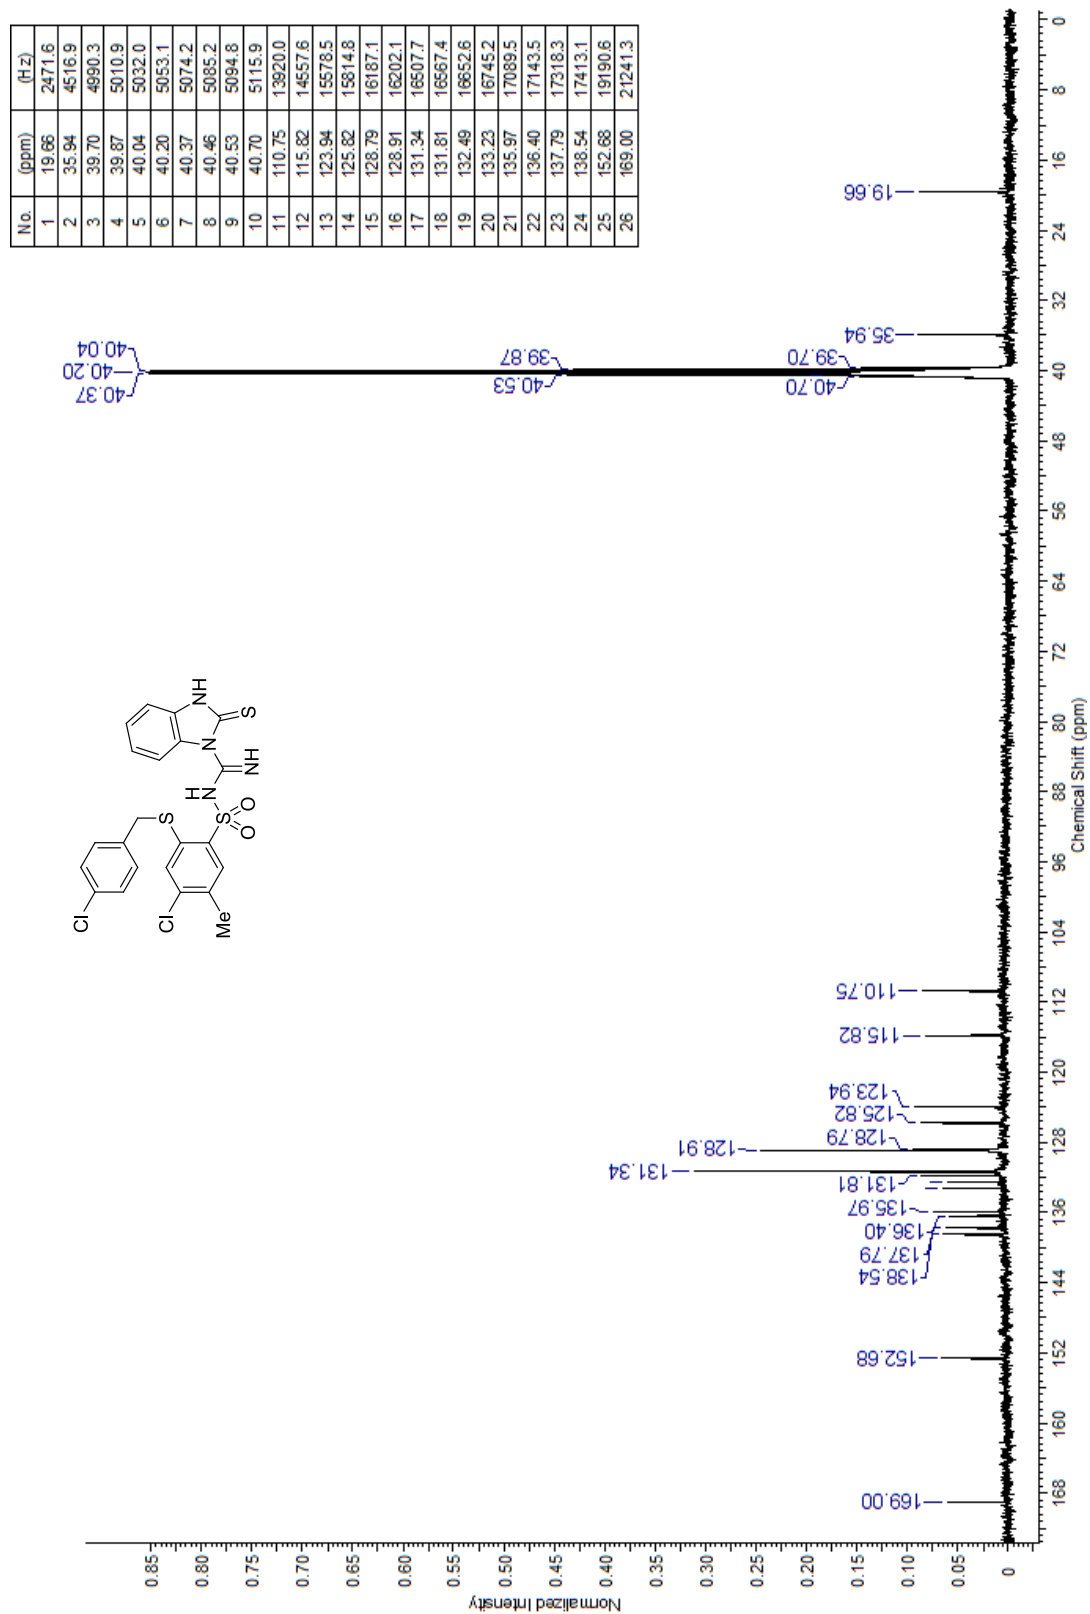

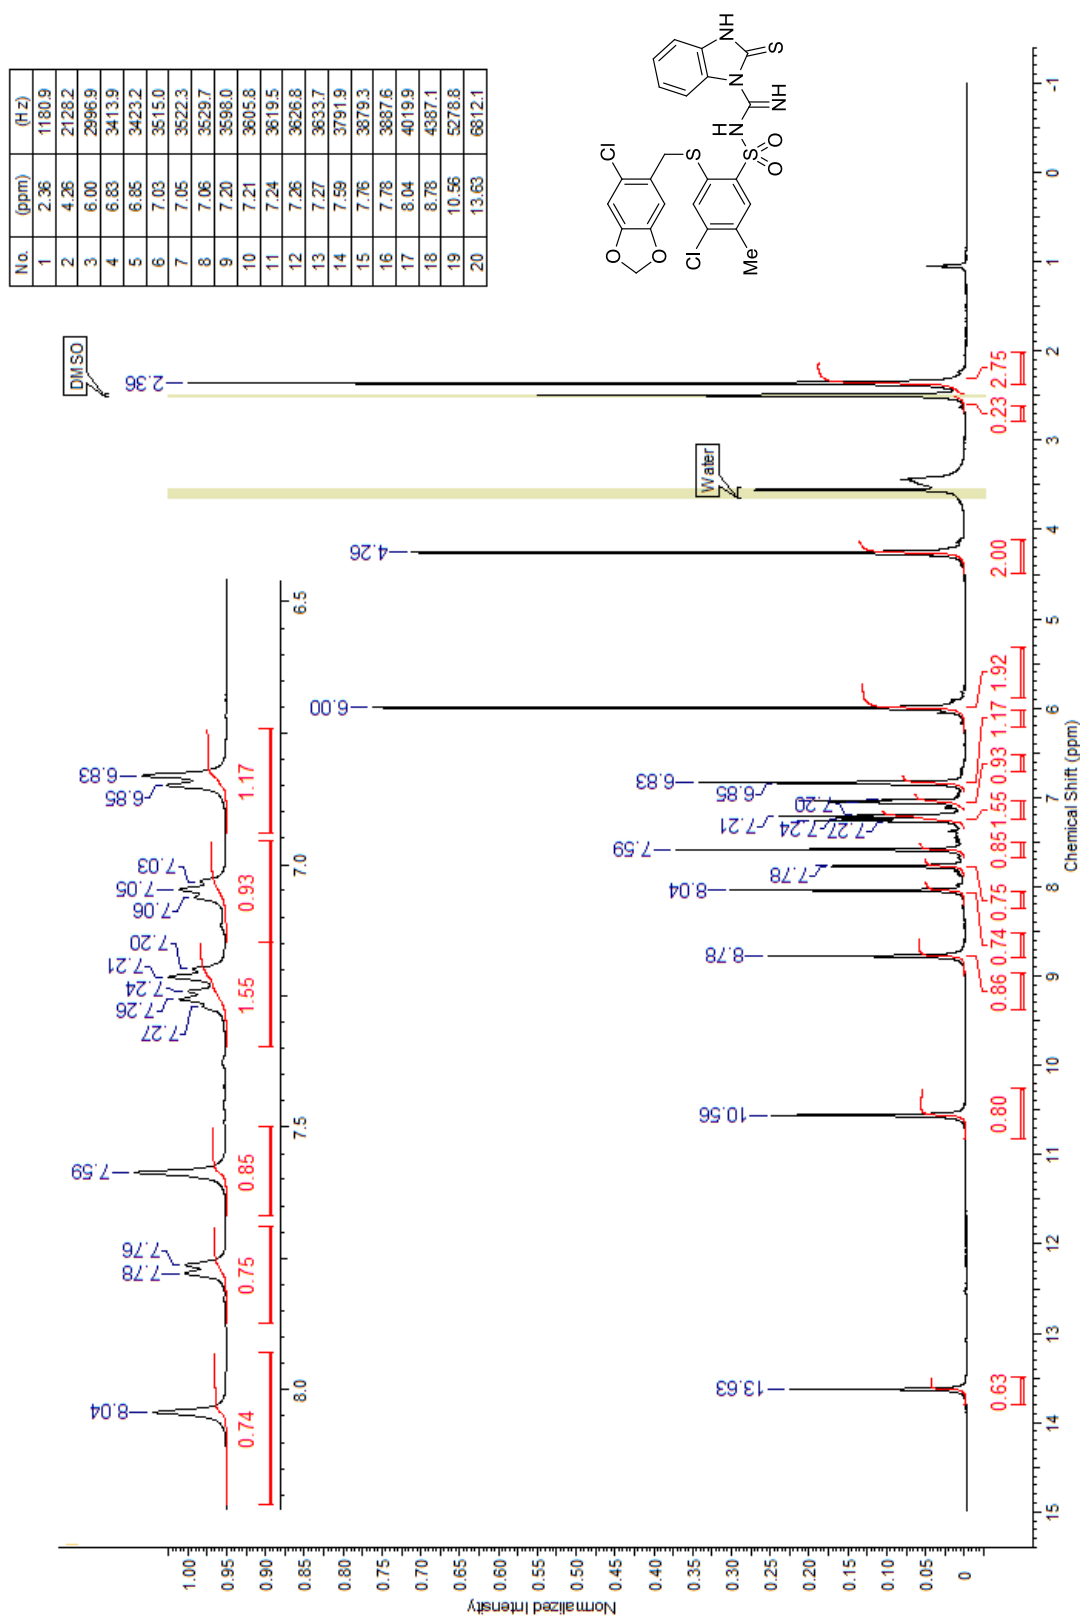

<sup>1</sup>H NMR of compd **23** (500 MHz, DMSO-*d*<sub>6</sub>).

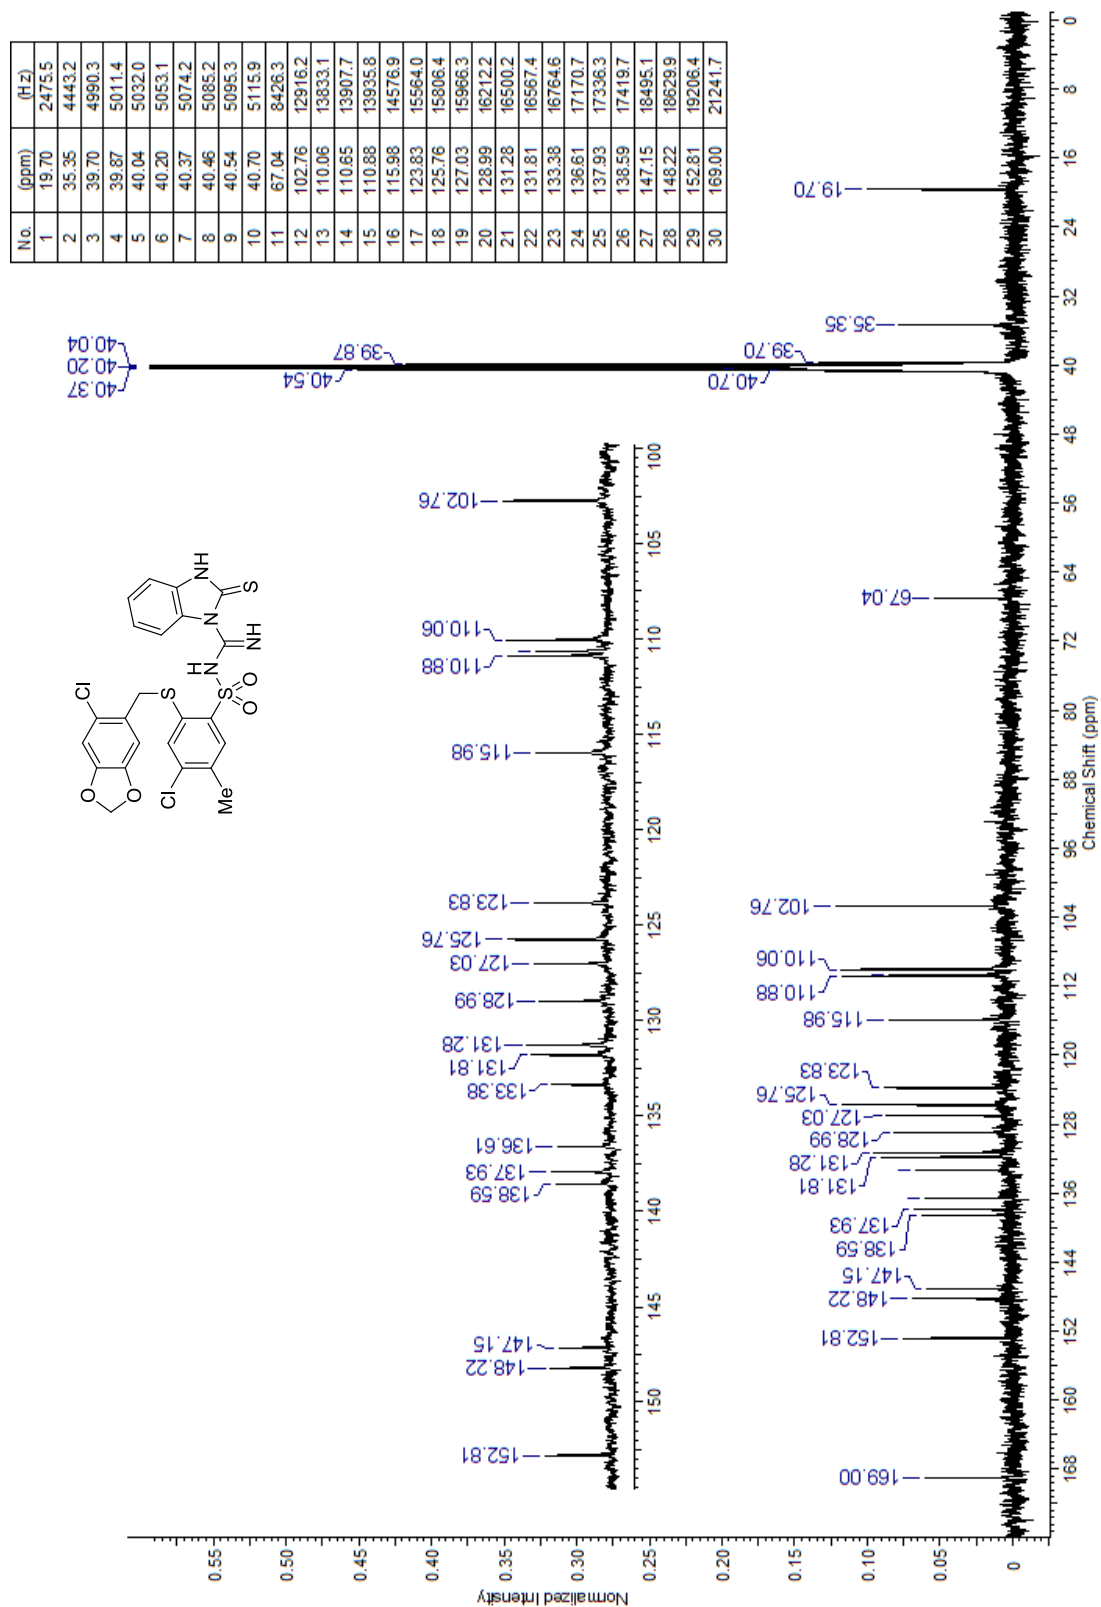

<sup>13</sup>C NMR of compd **23** (125 MHz, DMSO-*d*<sub>6</sub>).
